# Supplementary material
Source: PubMed Central journal article supplement (PMC5972027)
Supplement: NIHMS967382-supplement-spectra.pdf [file NIHMS967382-supplement-spectra.pdf]

**Enantioselective Synthesis of Thailanstatin A Methyl Ester and Evaluation  
of *in vitro* Splicing Inhibition**

Arun K. Ghosh,<sup>\*,†</sup> Anne M. Veitschegger,<sup>†</sup> Shenyue Nie,<sup>†</sup> Nicola Relitti<sup>†</sup>

Andrew J. MacRae,<sup>‡</sup> Melissa S. Jurica,<sup>‡</sup>

<sup>†</sup>*Department of Chemistry and Department of Medicinal Chemistry, Purdue University, 560 Oval Drive, West Lafayette, Indiana 47907;* <sup>‡</sup>*Department of Molecular, Cell and Developmental Biology and Center for Molecular Biology of RNA, University of California, Santa Cruz, California 95064*

akghosh@purdue.edu

Copies of <sup>1</sup>H and <sup>13</sup>C spectra of new compounds-----S2-S37

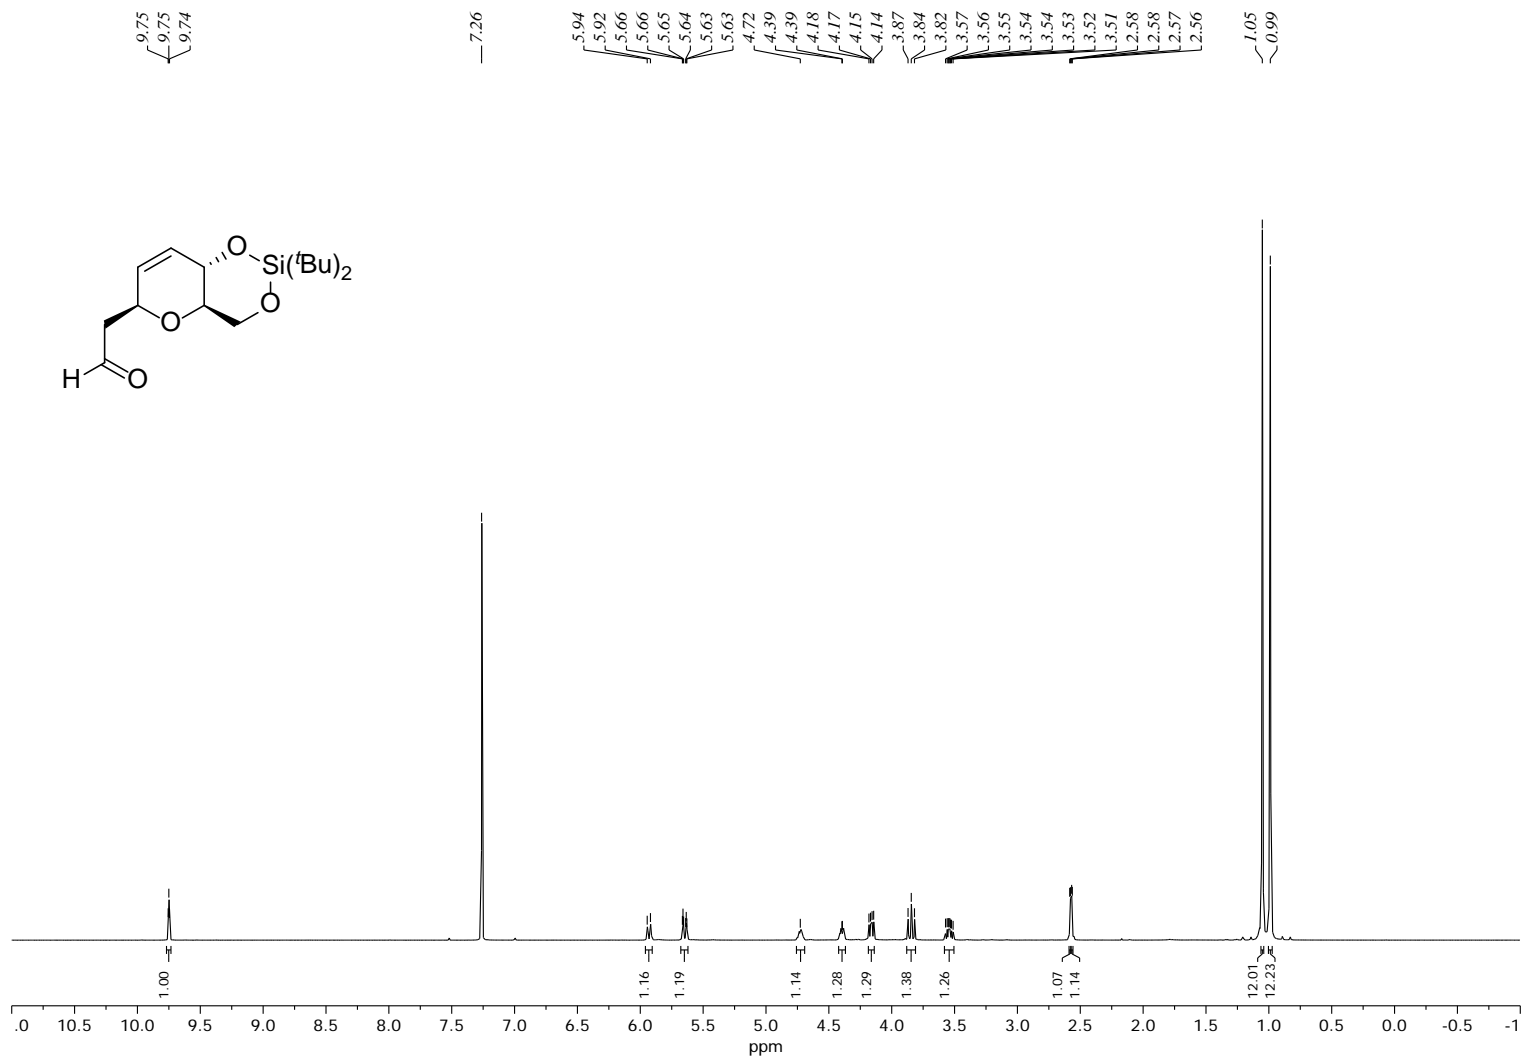

Figure S1. <sup>1</sup>H NMR (400 MHz, CDCl<sub>3</sub>) of Aldehyde **15**

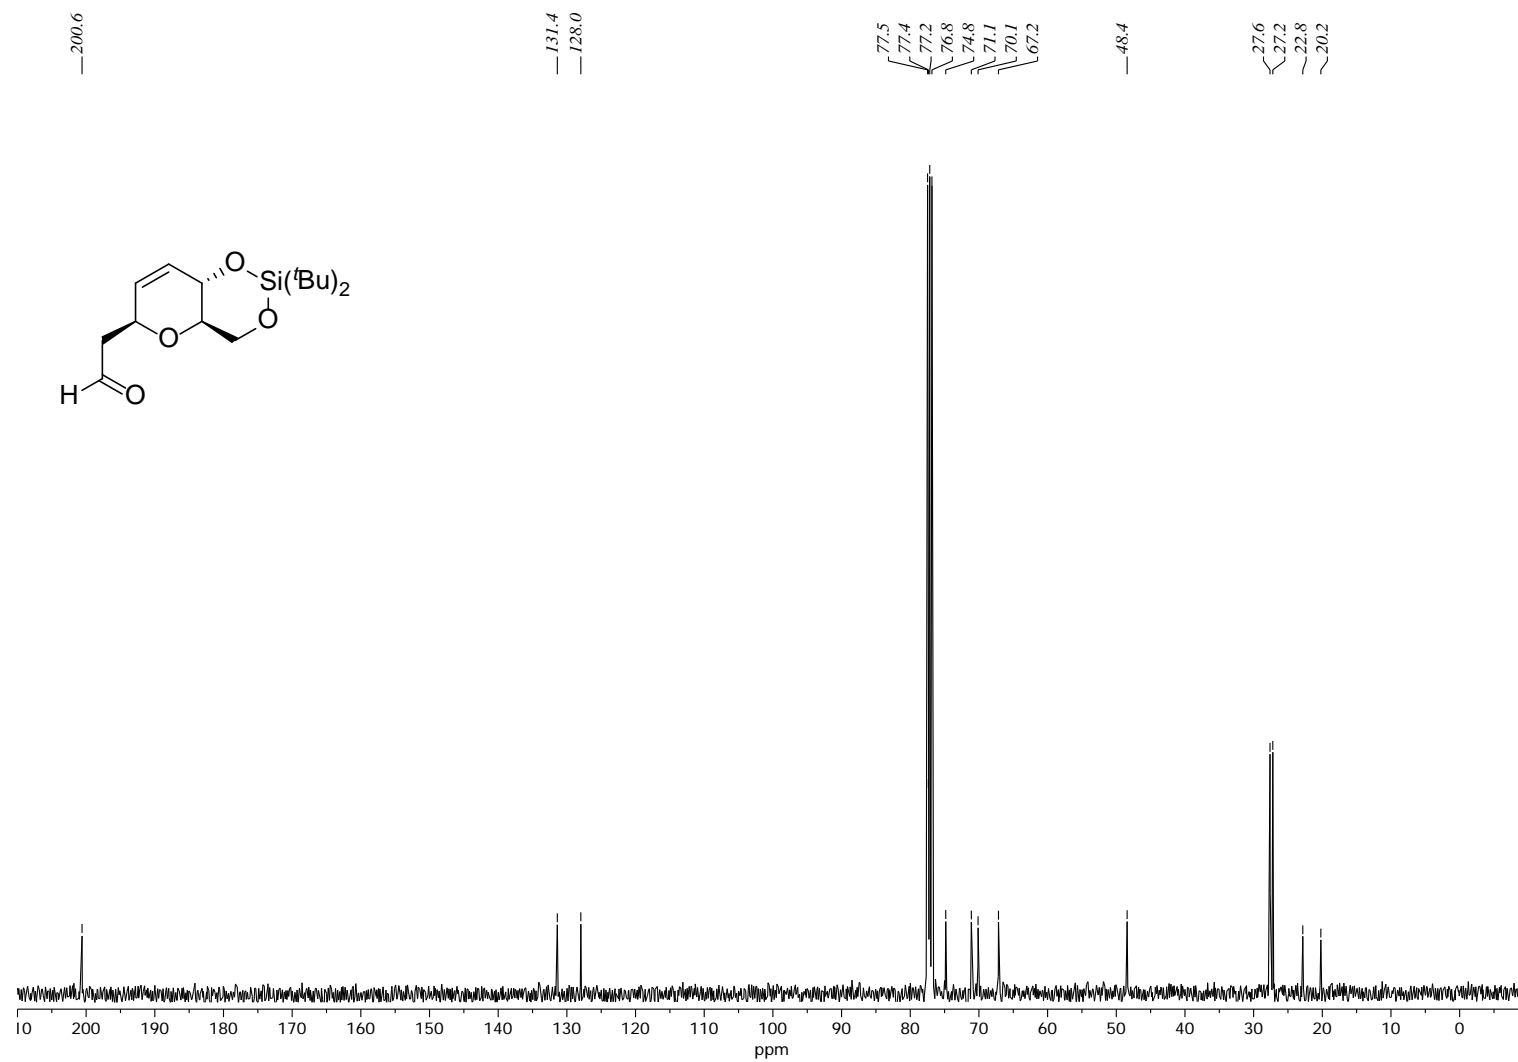

Figure S2. <sup>13</sup>C NMR (100 MHz, CDCl<sub>3</sub>) of Aldehyde **15**

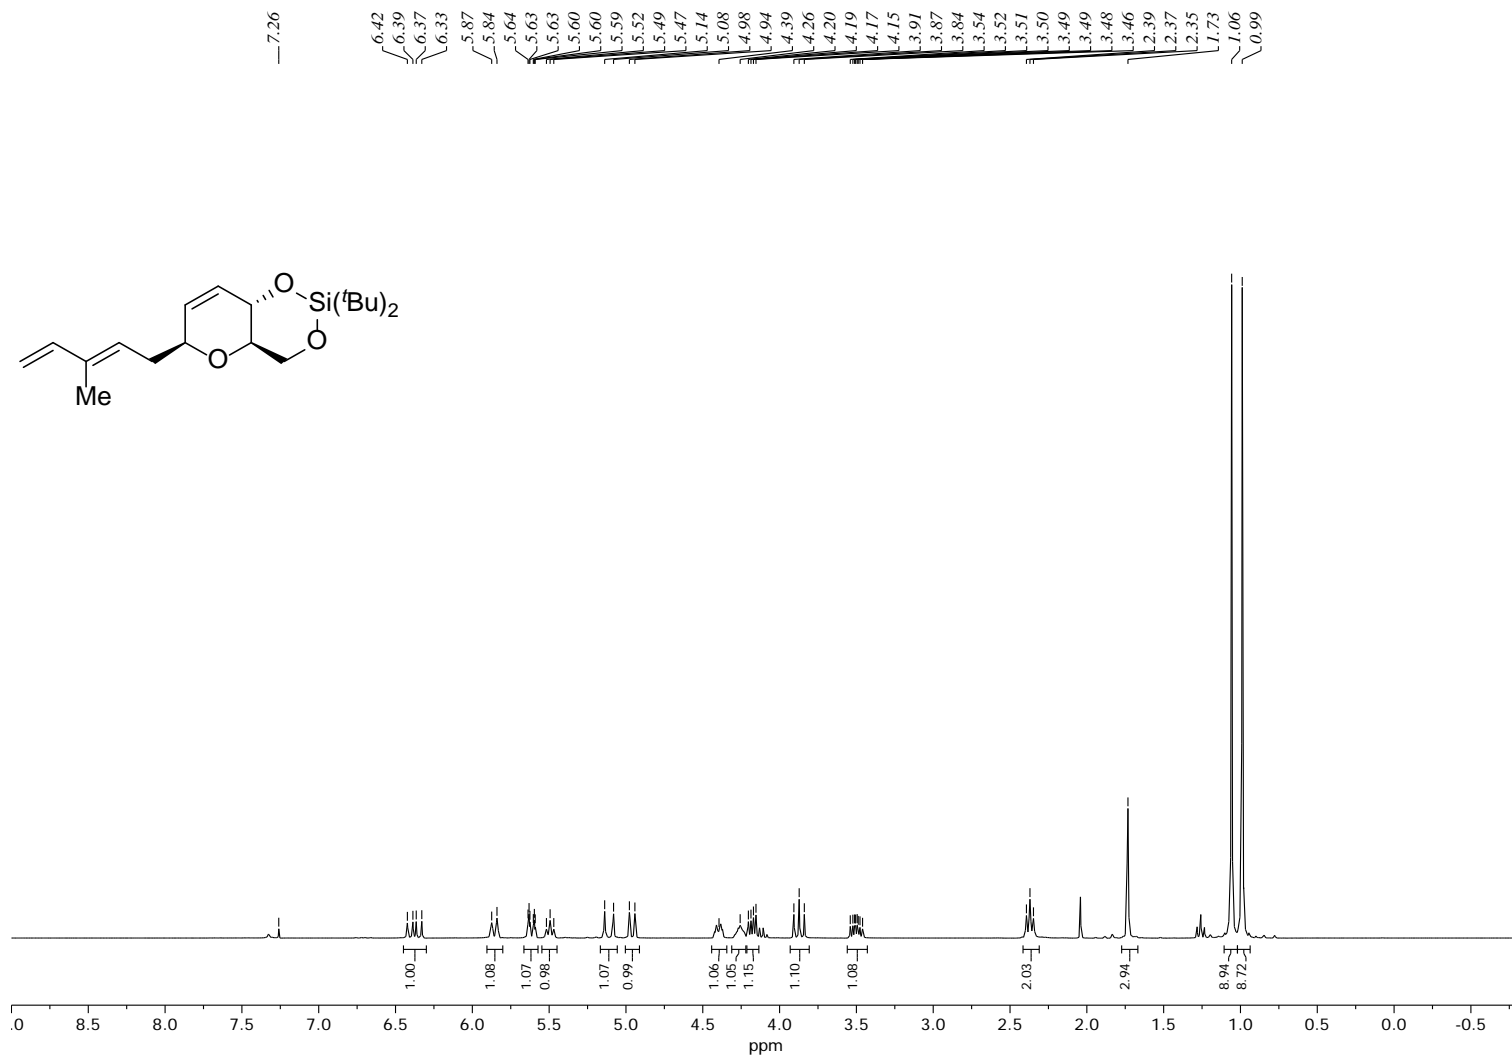

Figure S3. <sup>1</sup>H NMR (300 MHz, CDCl<sub>3</sub>) of Diene **16**

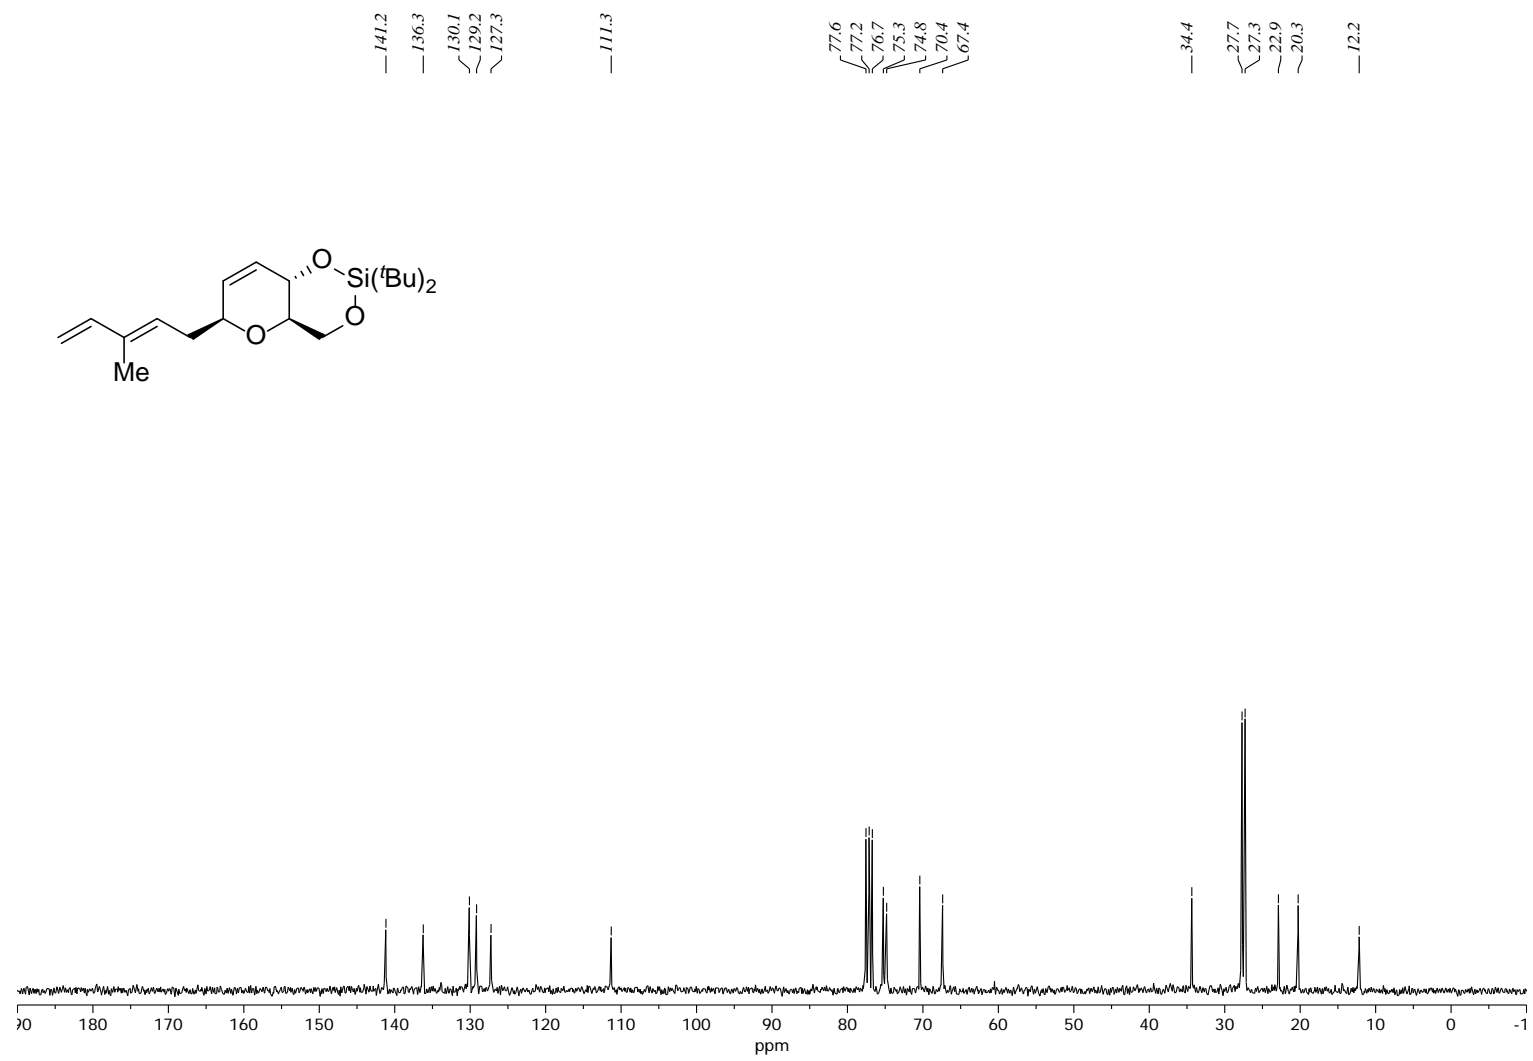

Figure S4. <sup>13</sup>C NMR (75 MHz, CDCl<sub>3</sub>) of Diene **16**

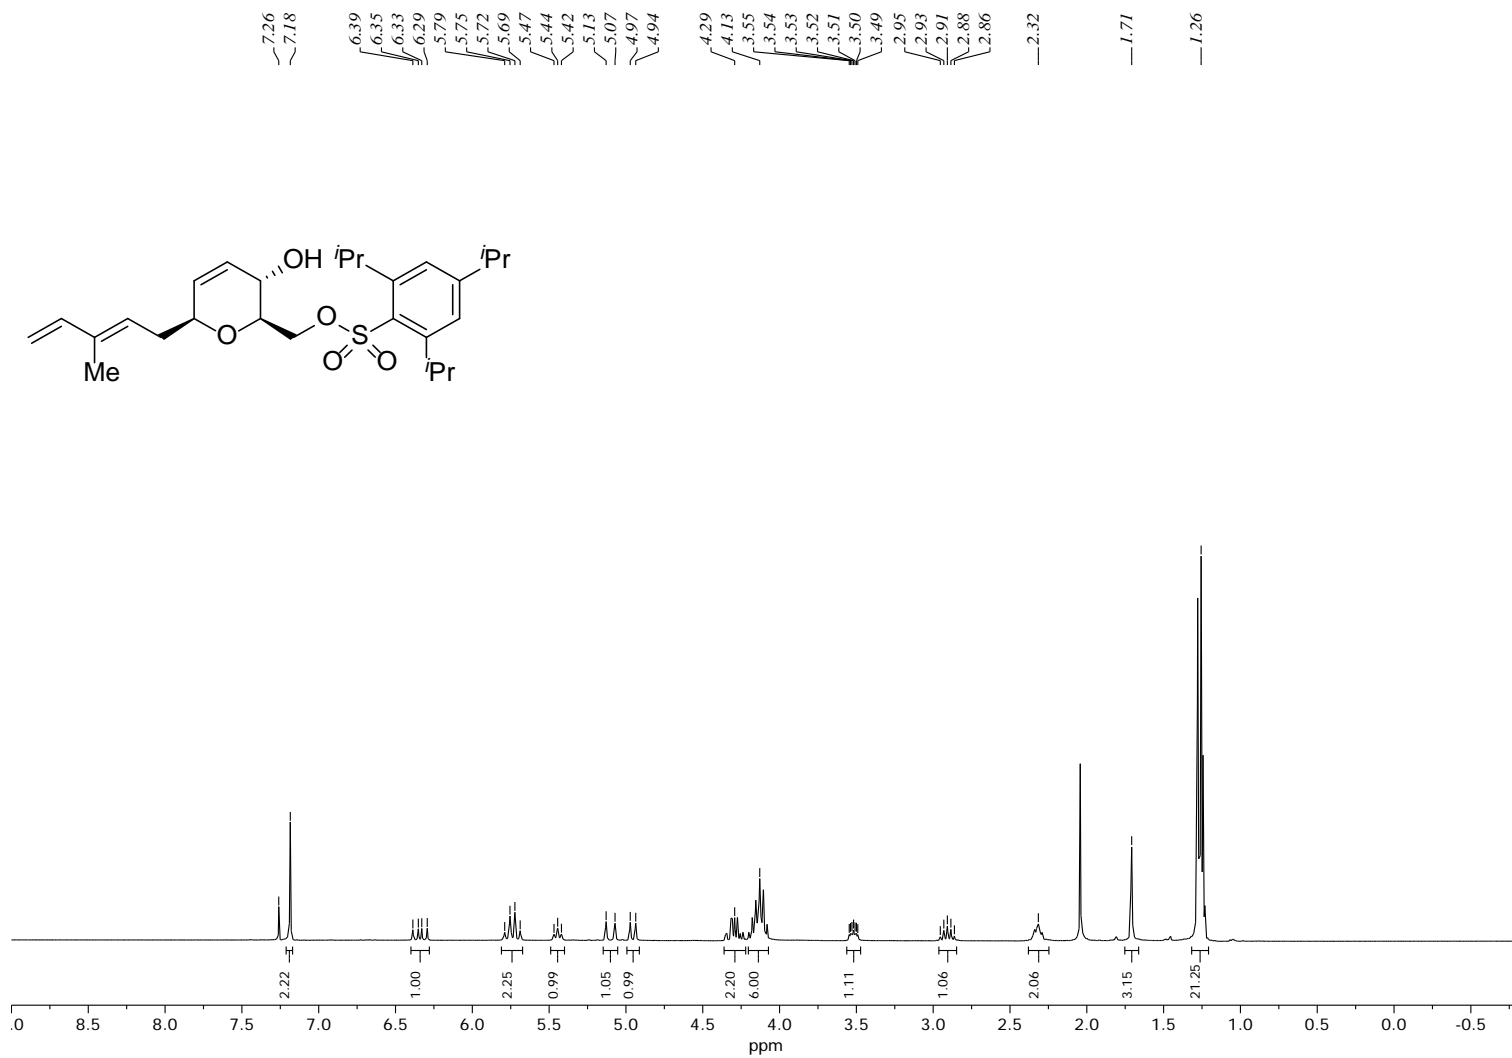

Figure S5. <sup>1</sup>H NMR (300 MHz, CDCl<sub>3</sub>) of Sulfonate **17**

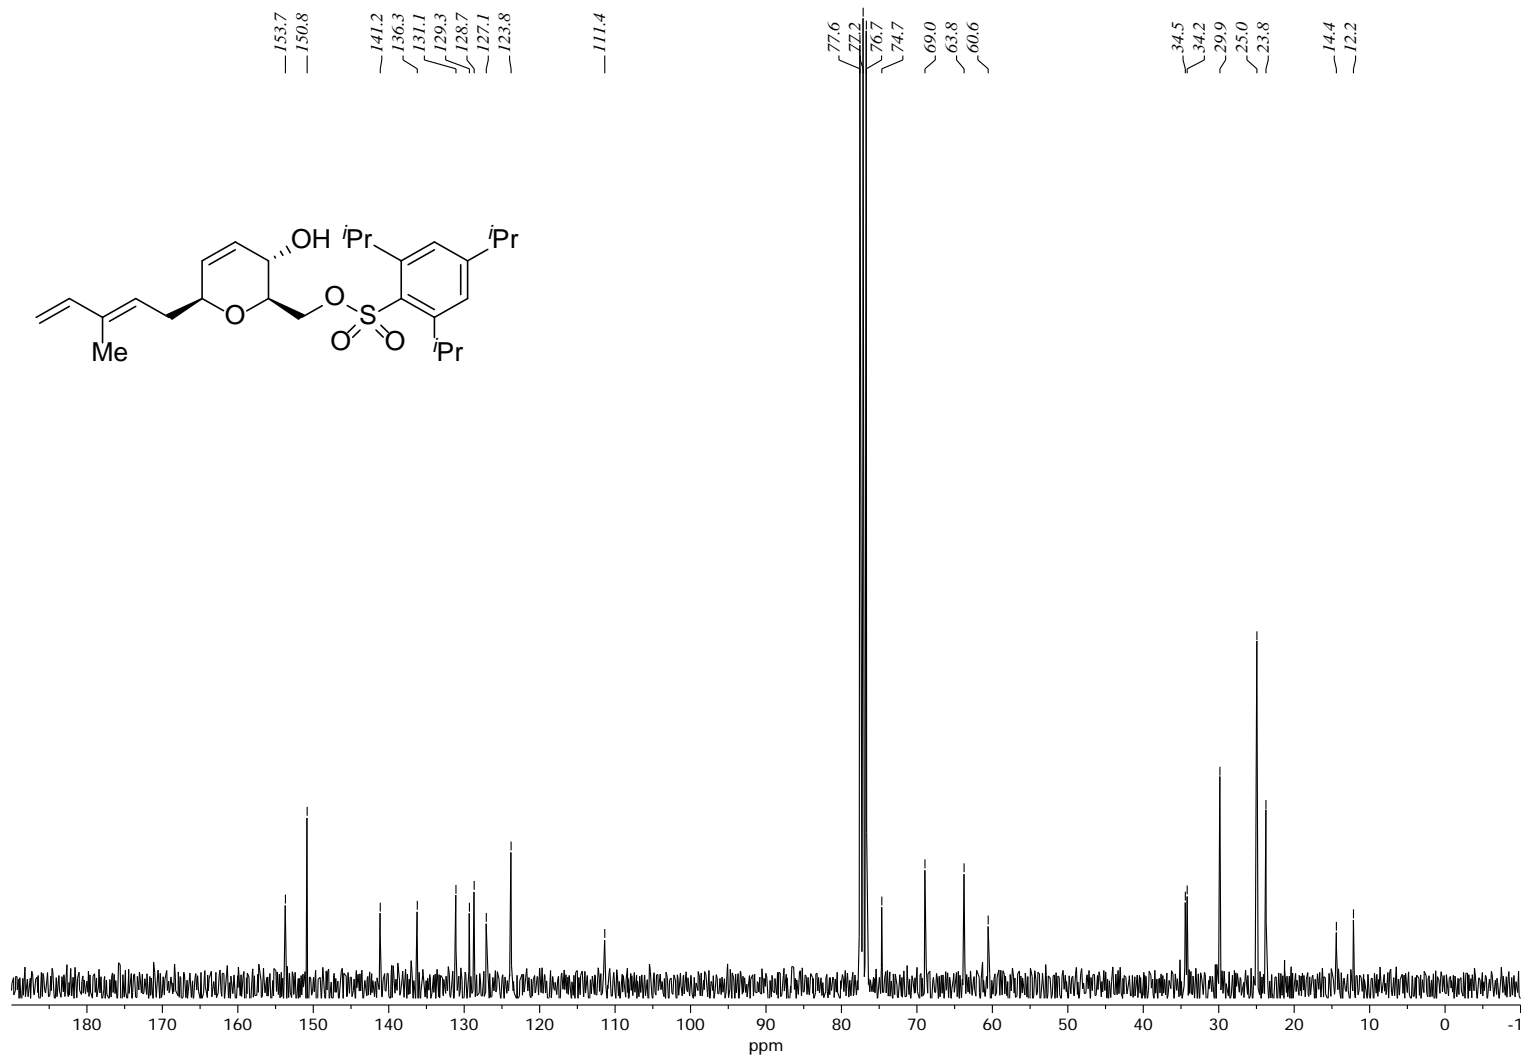

Figure S6. <sup>13</sup>C NMR (75 MHz, CDCl<sub>3</sub>) of Sulfonate **17**

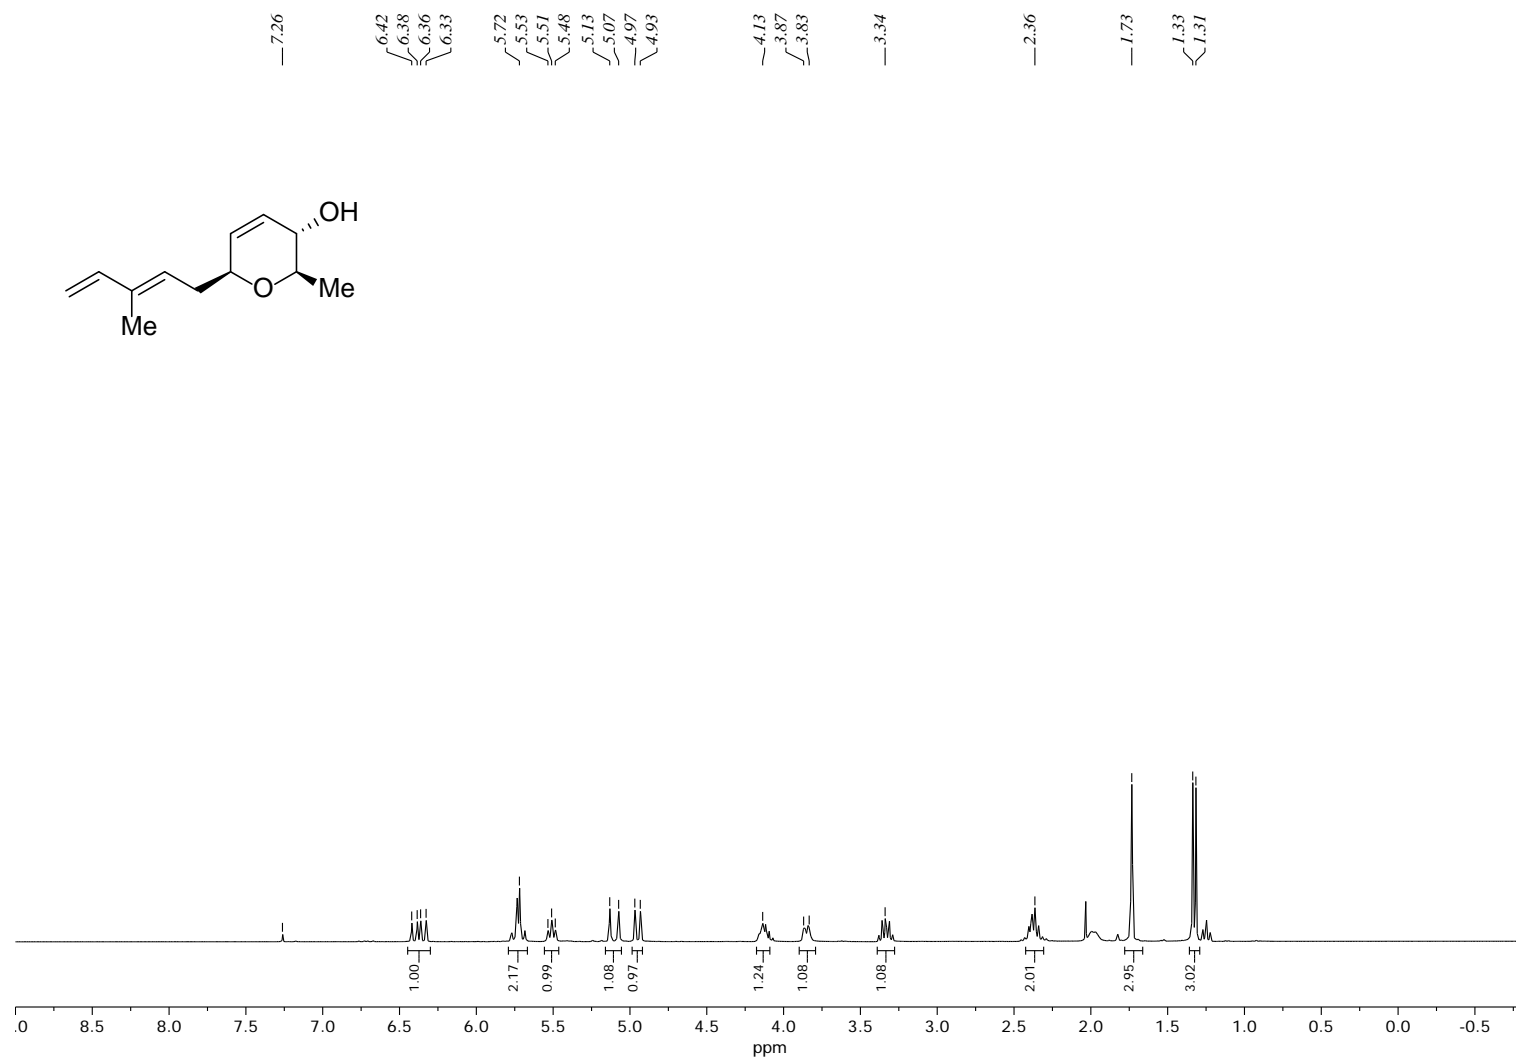

Figure S7.  $^1\text{H}$  NMR (300 MHz,  $\text{CDCl}_3$ ) of Dihydropyran **18**



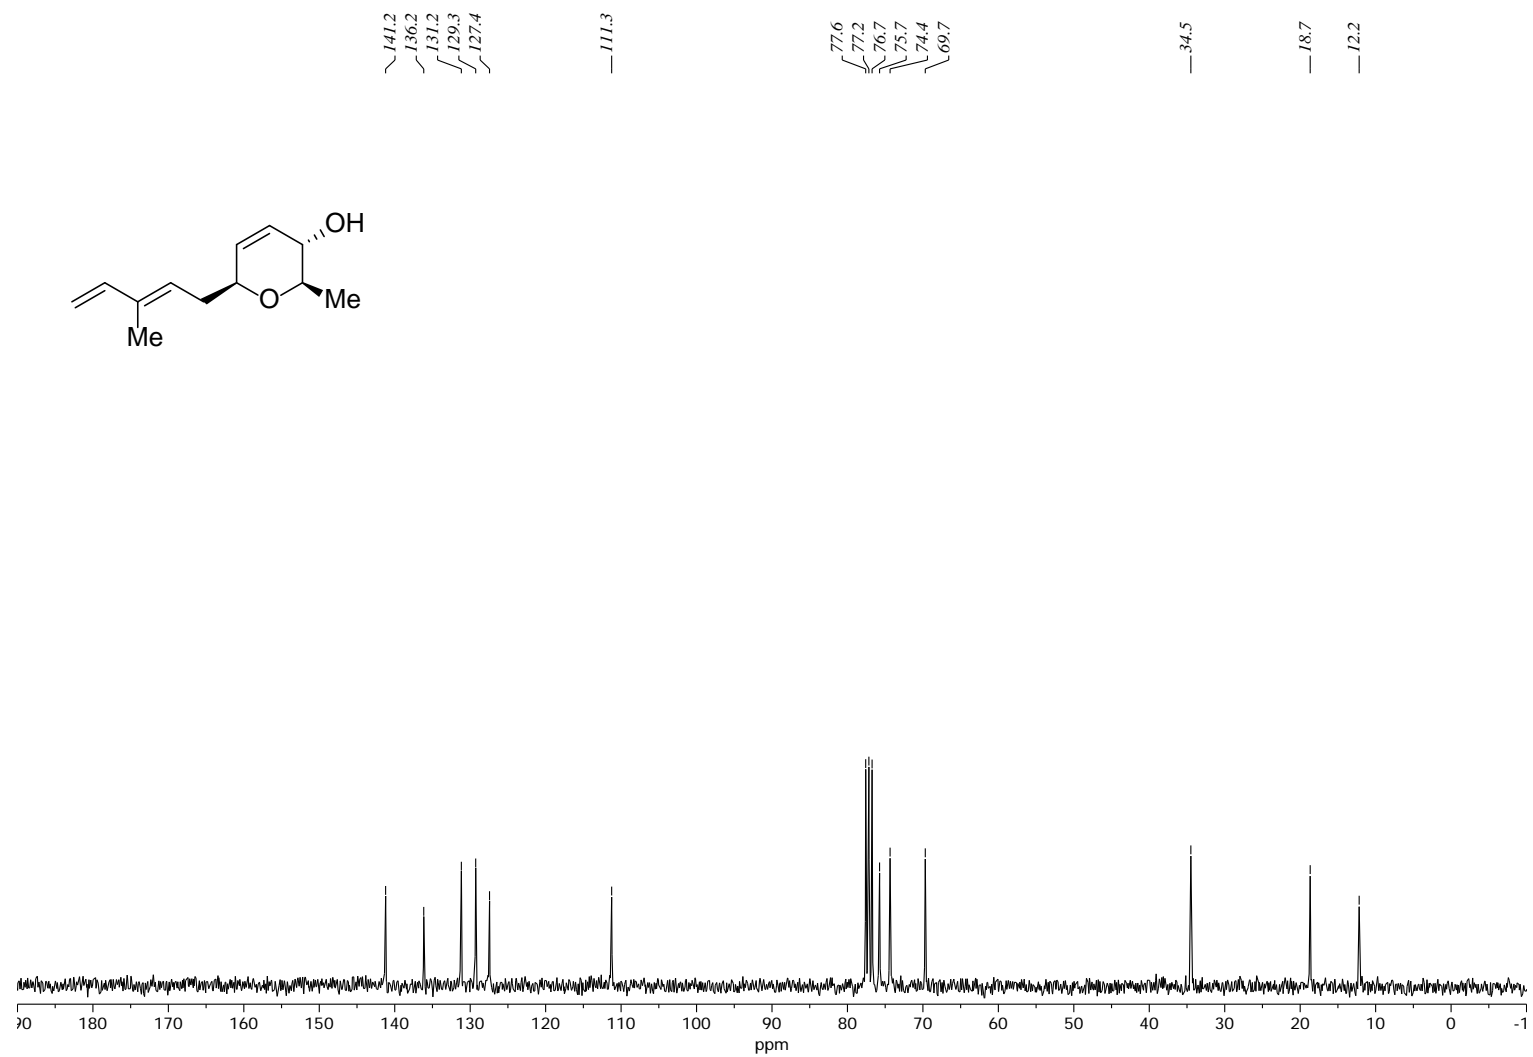

Figure S8. <sup>13</sup>C NMR (75 MHz, CDCl<sub>3</sub>) of Dihydropyran **18**

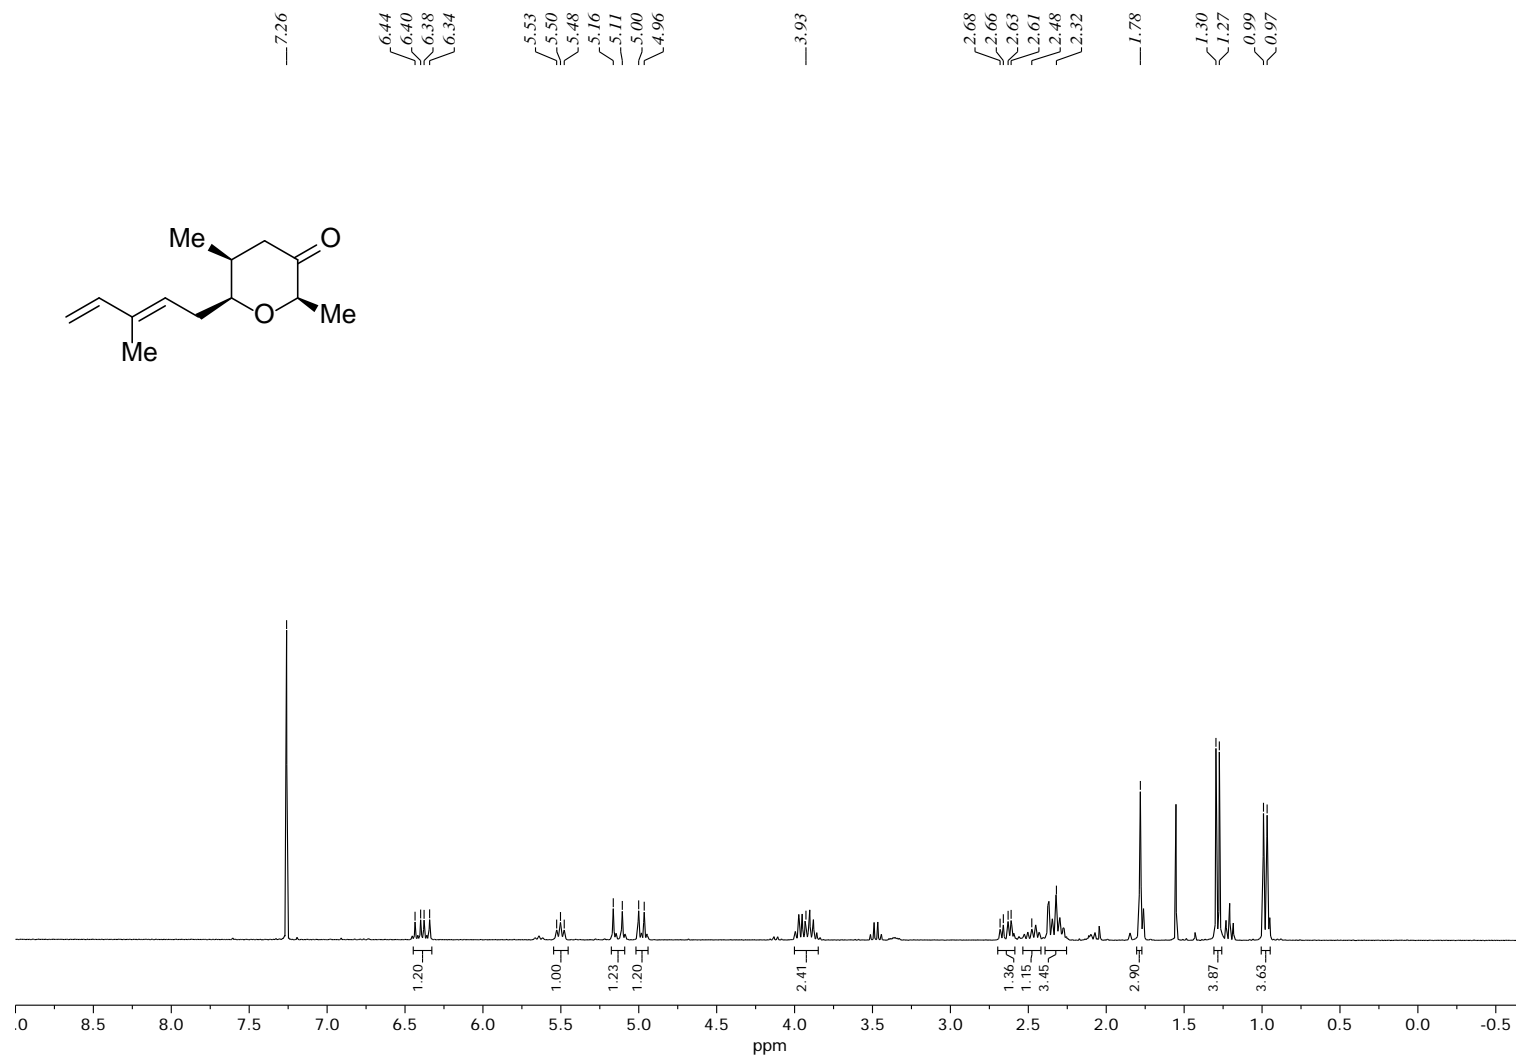

Figure S9. <sup>1</sup>H NMR (400 MHz, CDCl<sub>3</sub>) of Ketone **19**

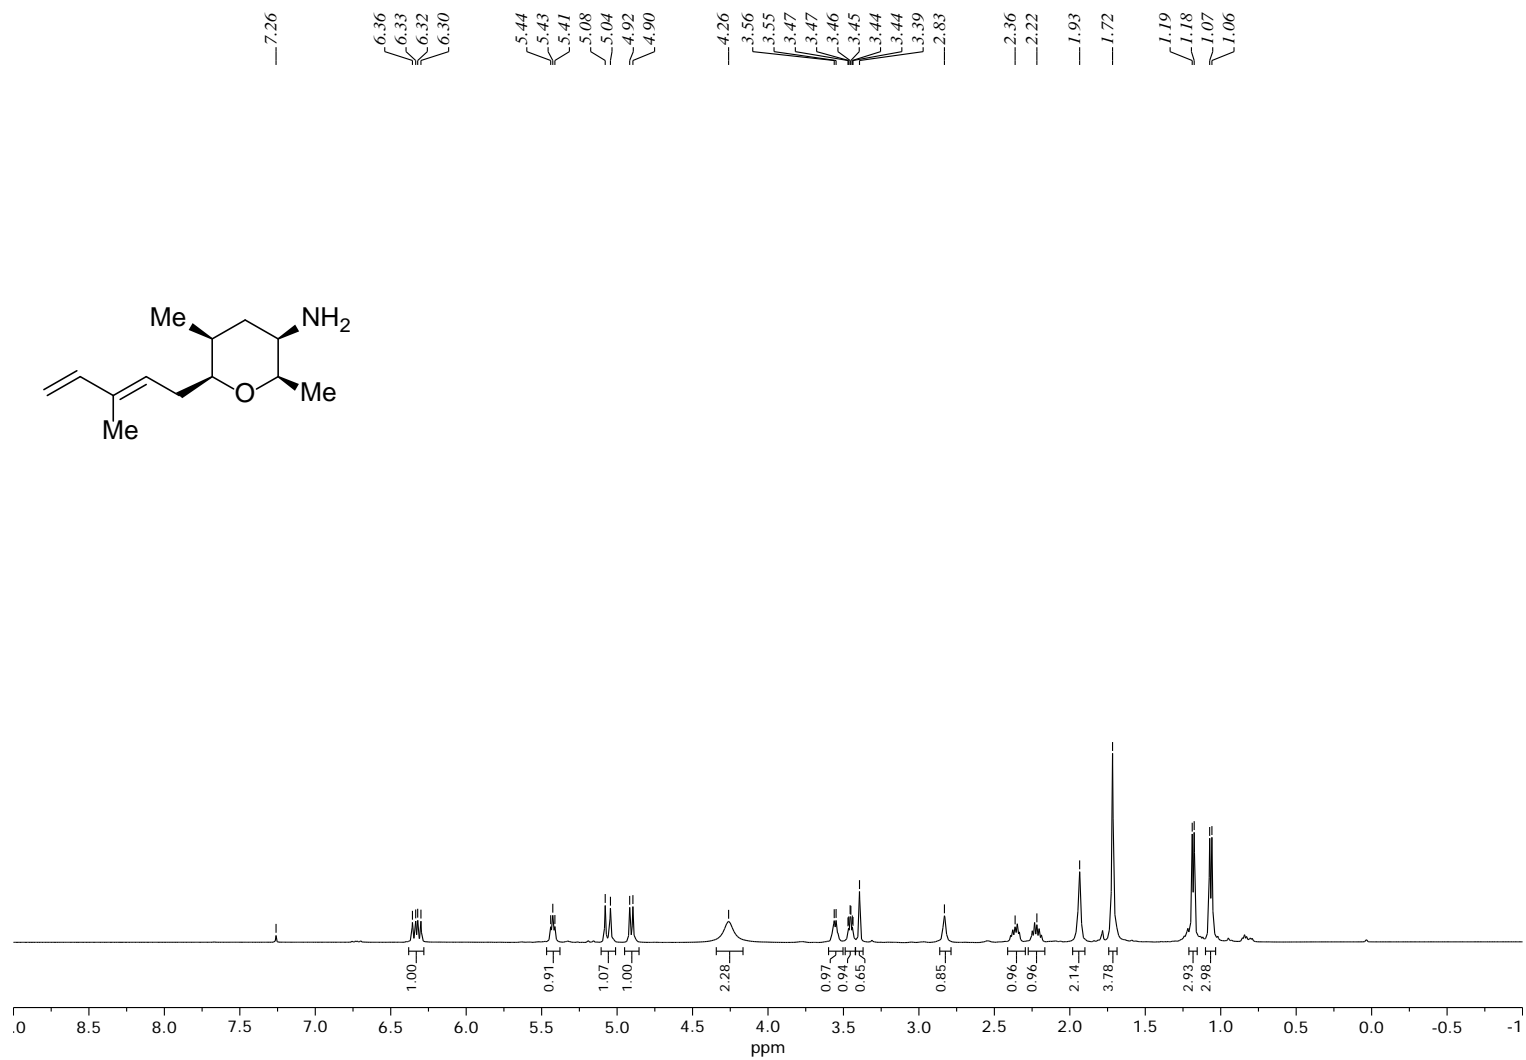

Figure S10. <sup>1</sup>H NMR (500 MHz, CDCl<sub>3</sub>) of Amine 9

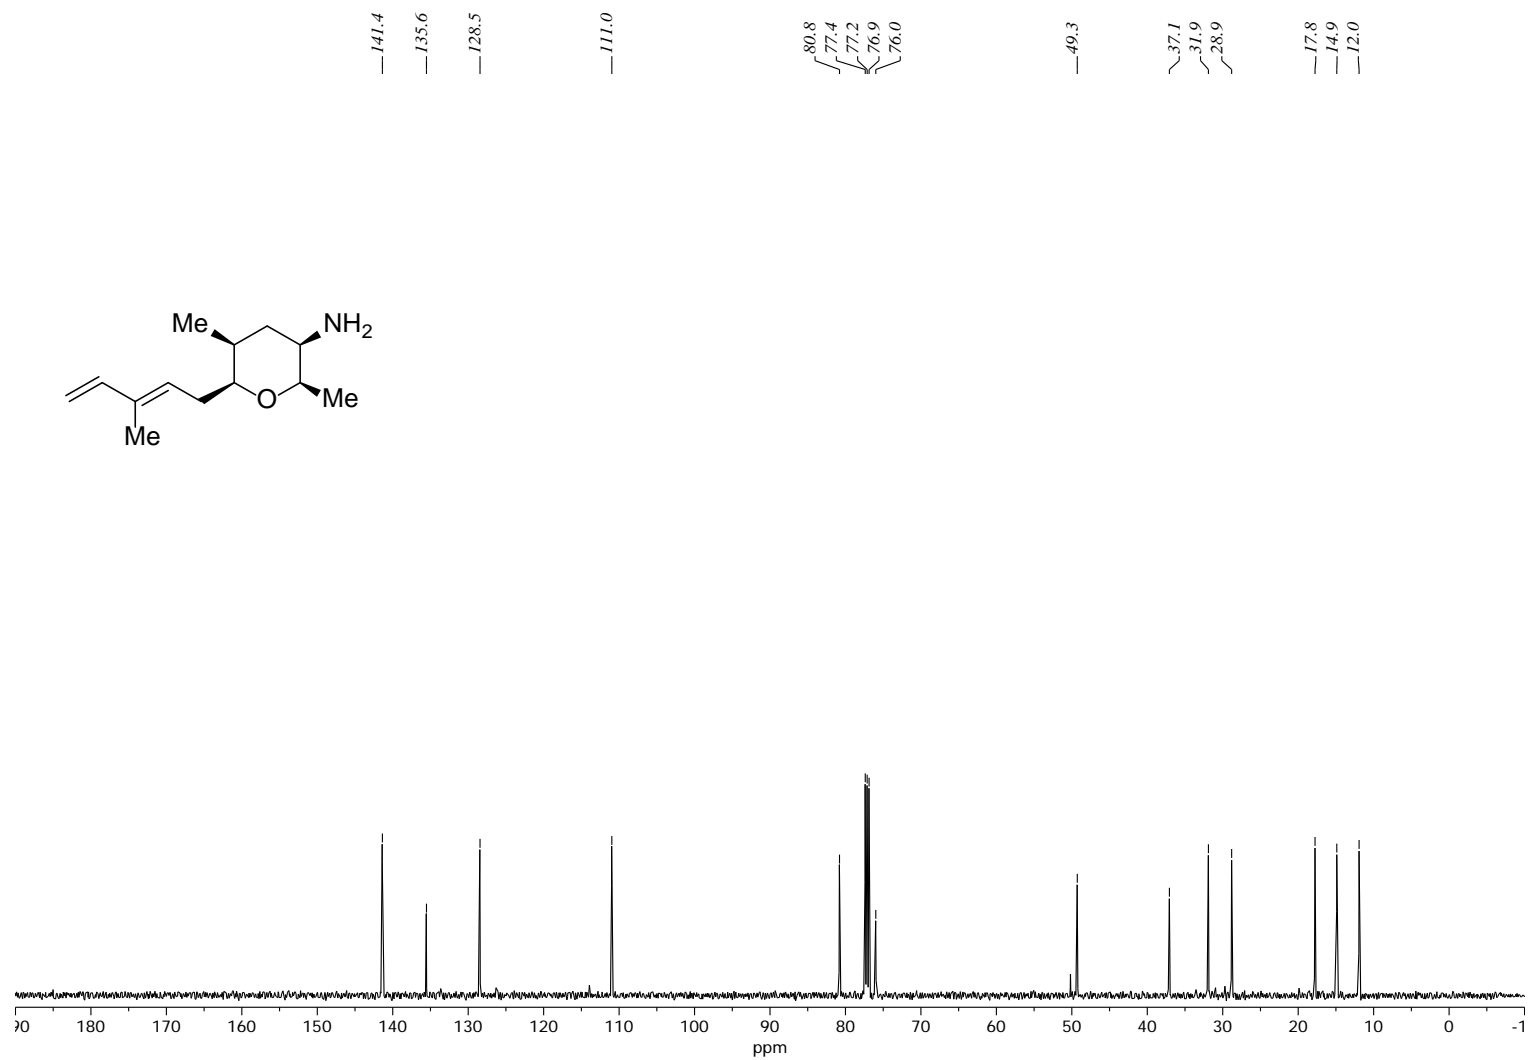

Figure S11.  $^{13}\text{C}$  NMR (125 MHz,  $\text{CDCl}_3$ ) of Amine 9

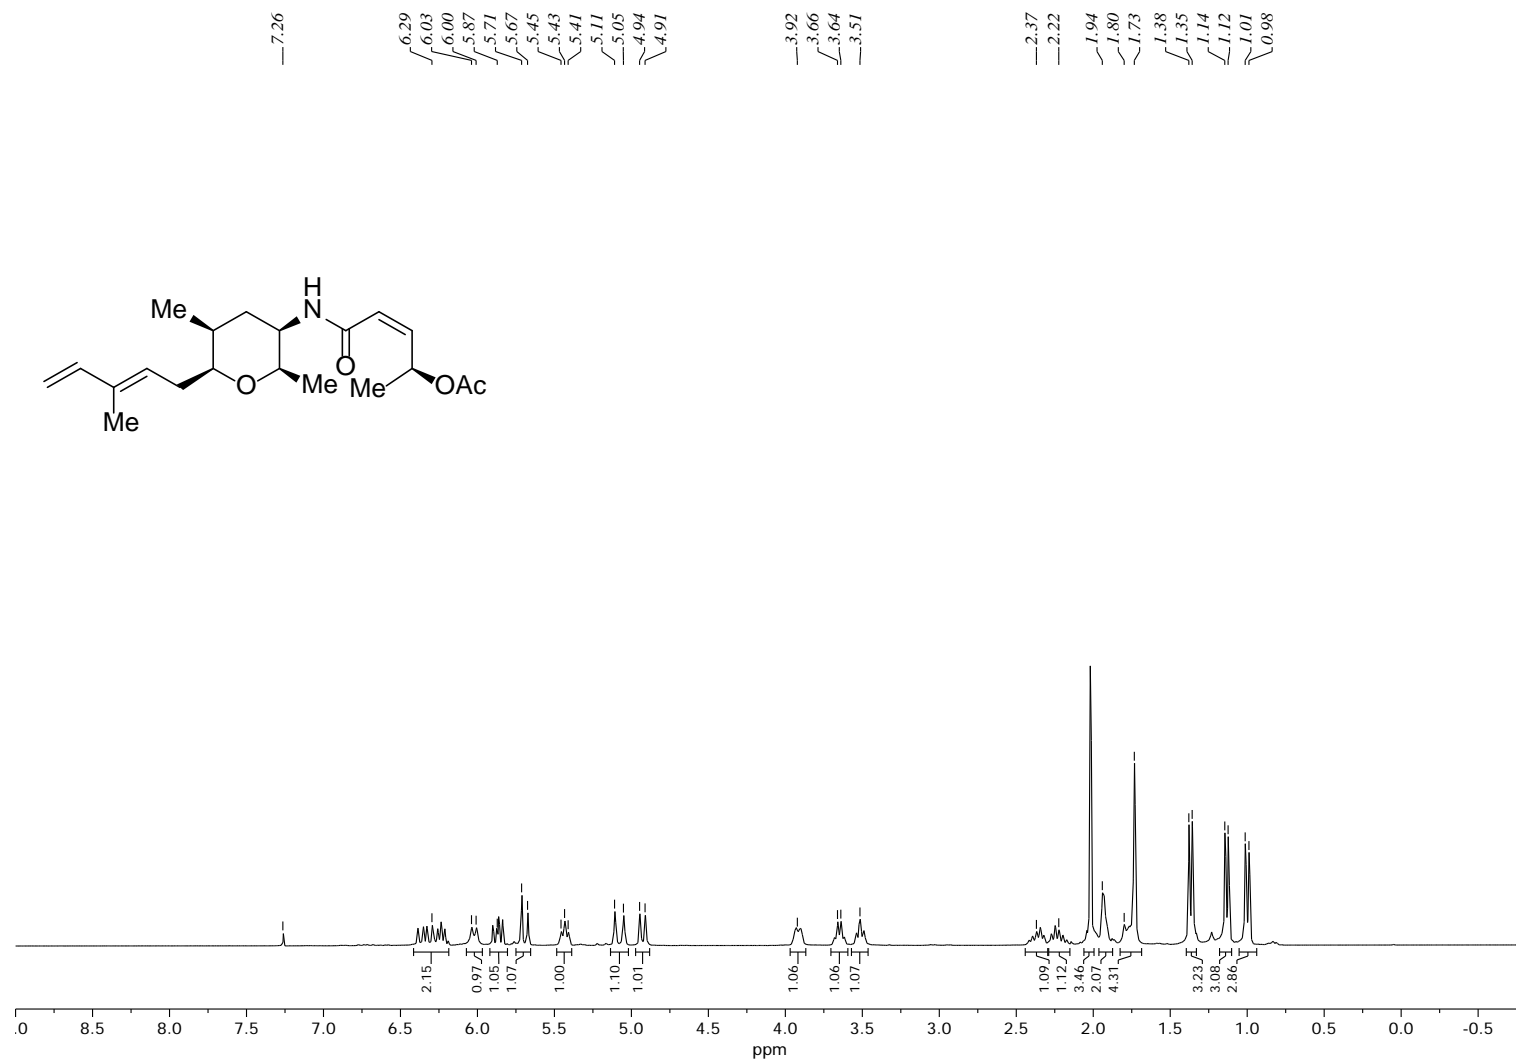

Figure S12. <sup>1</sup>H NMR (300 MHz, CDCl<sub>3</sub>) of Amide 7

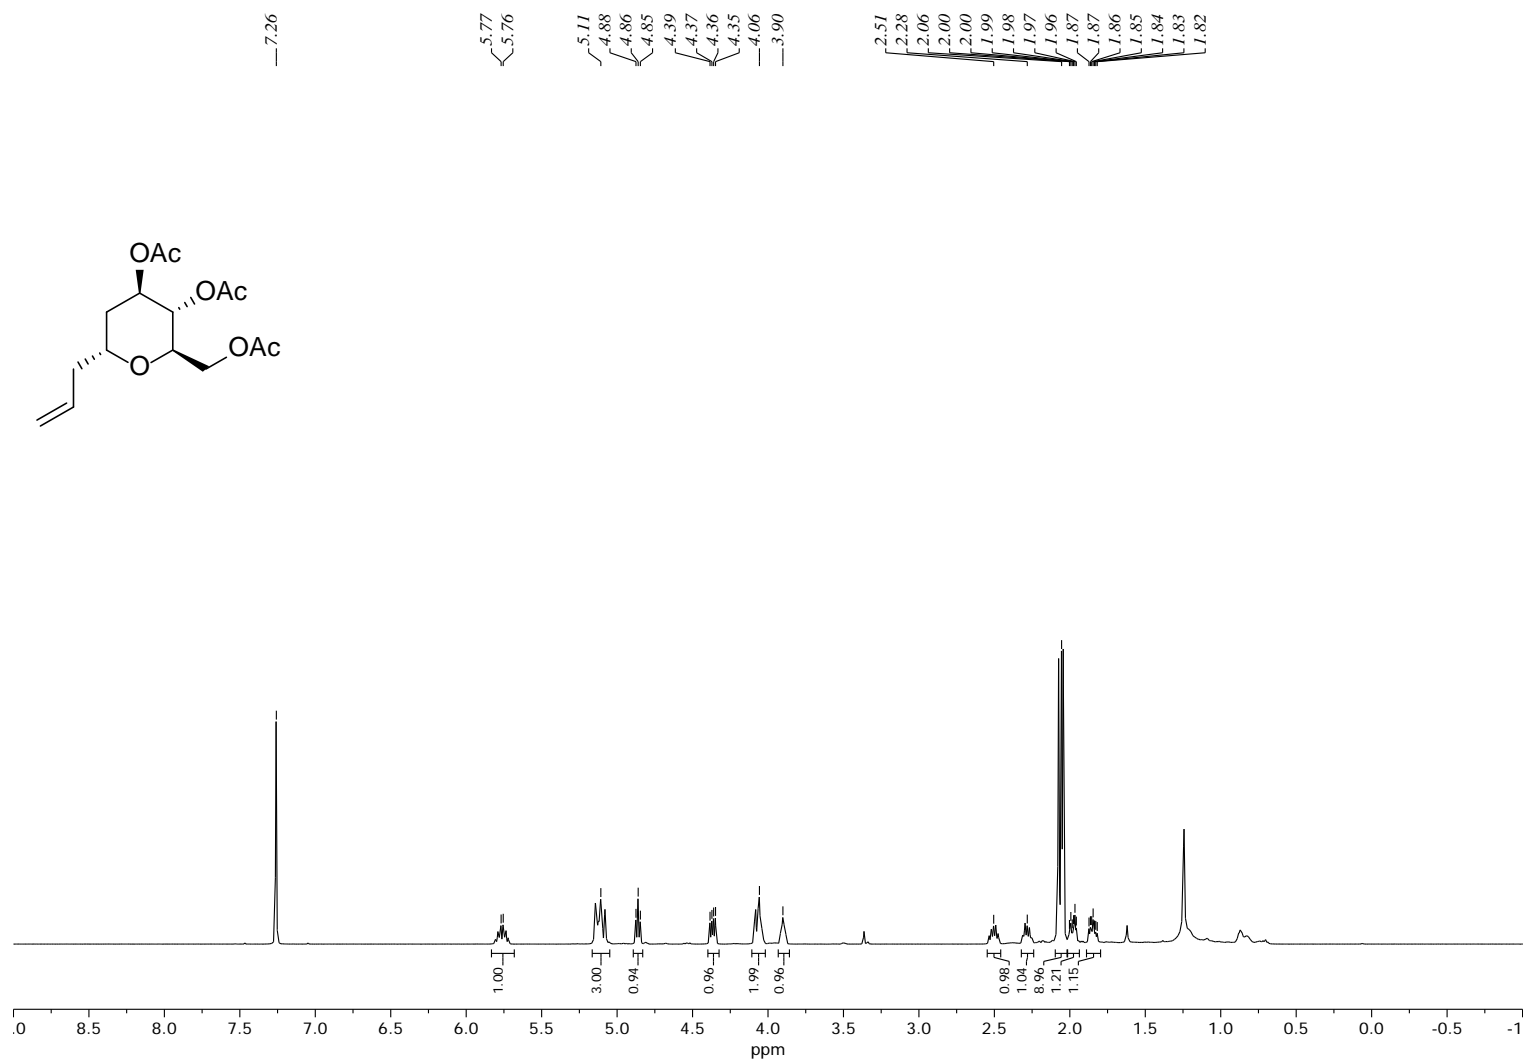

Figure S13. <sup>1</sup>H NMR (500 MHz, CDCl<sub>3</sub>) of THP **22**

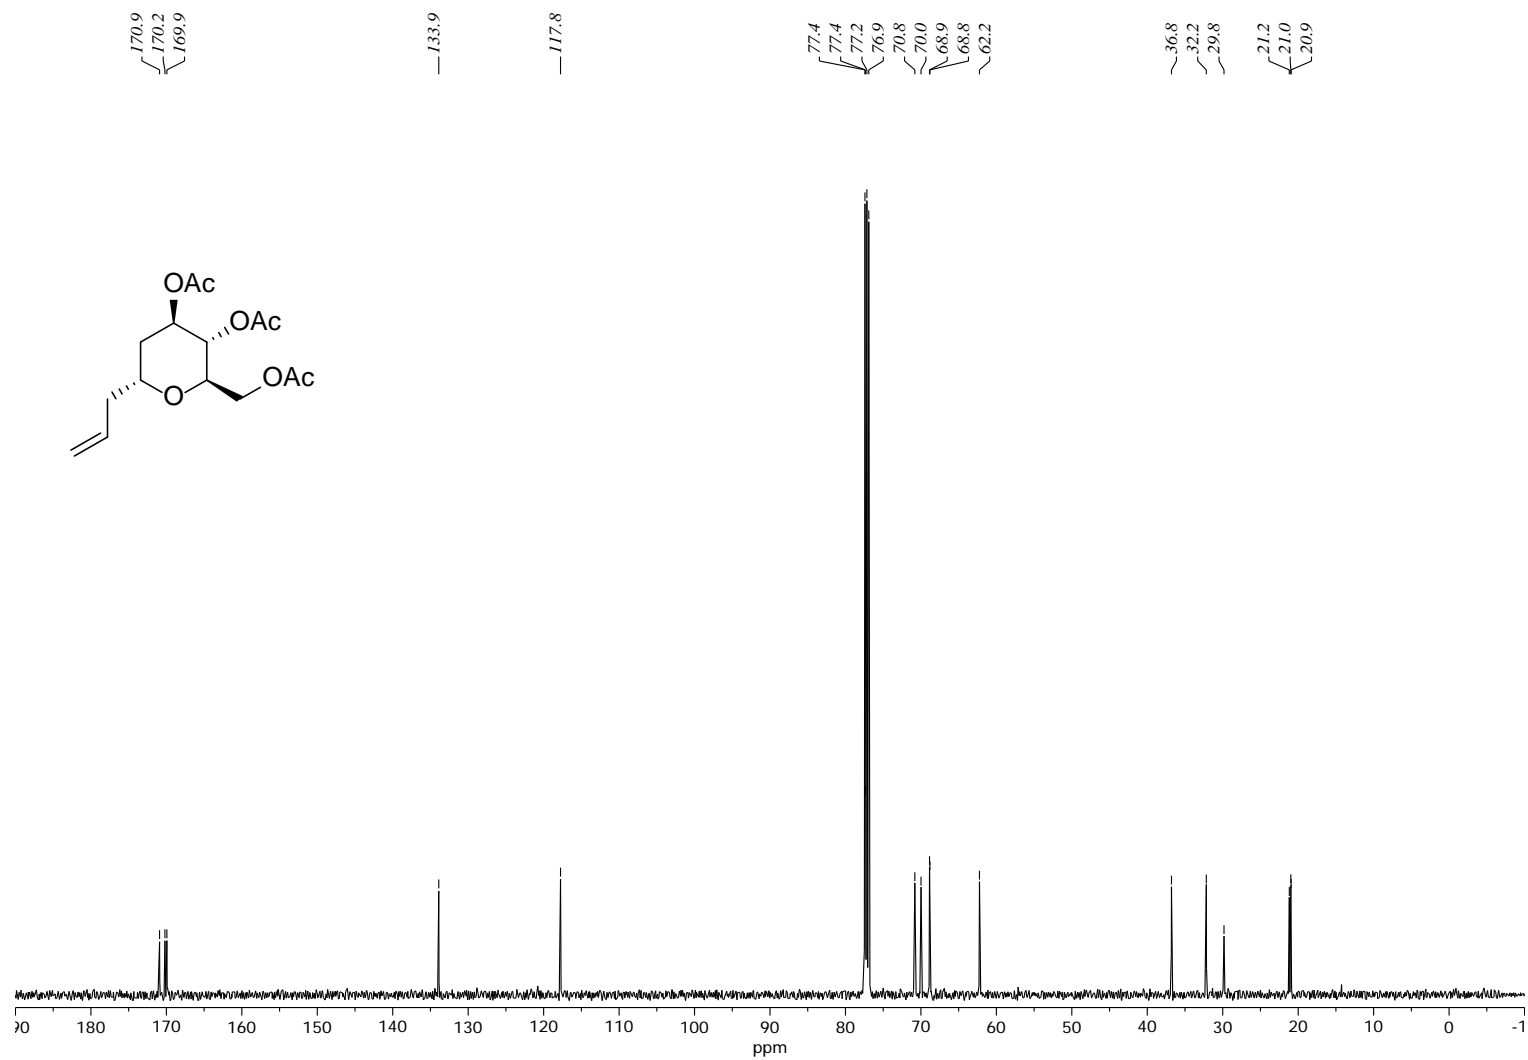

Figure S14.  $^{13}\text{C}$  NMR (125 MHz,  $\text{CDCl}_3$ ) of THP **22**

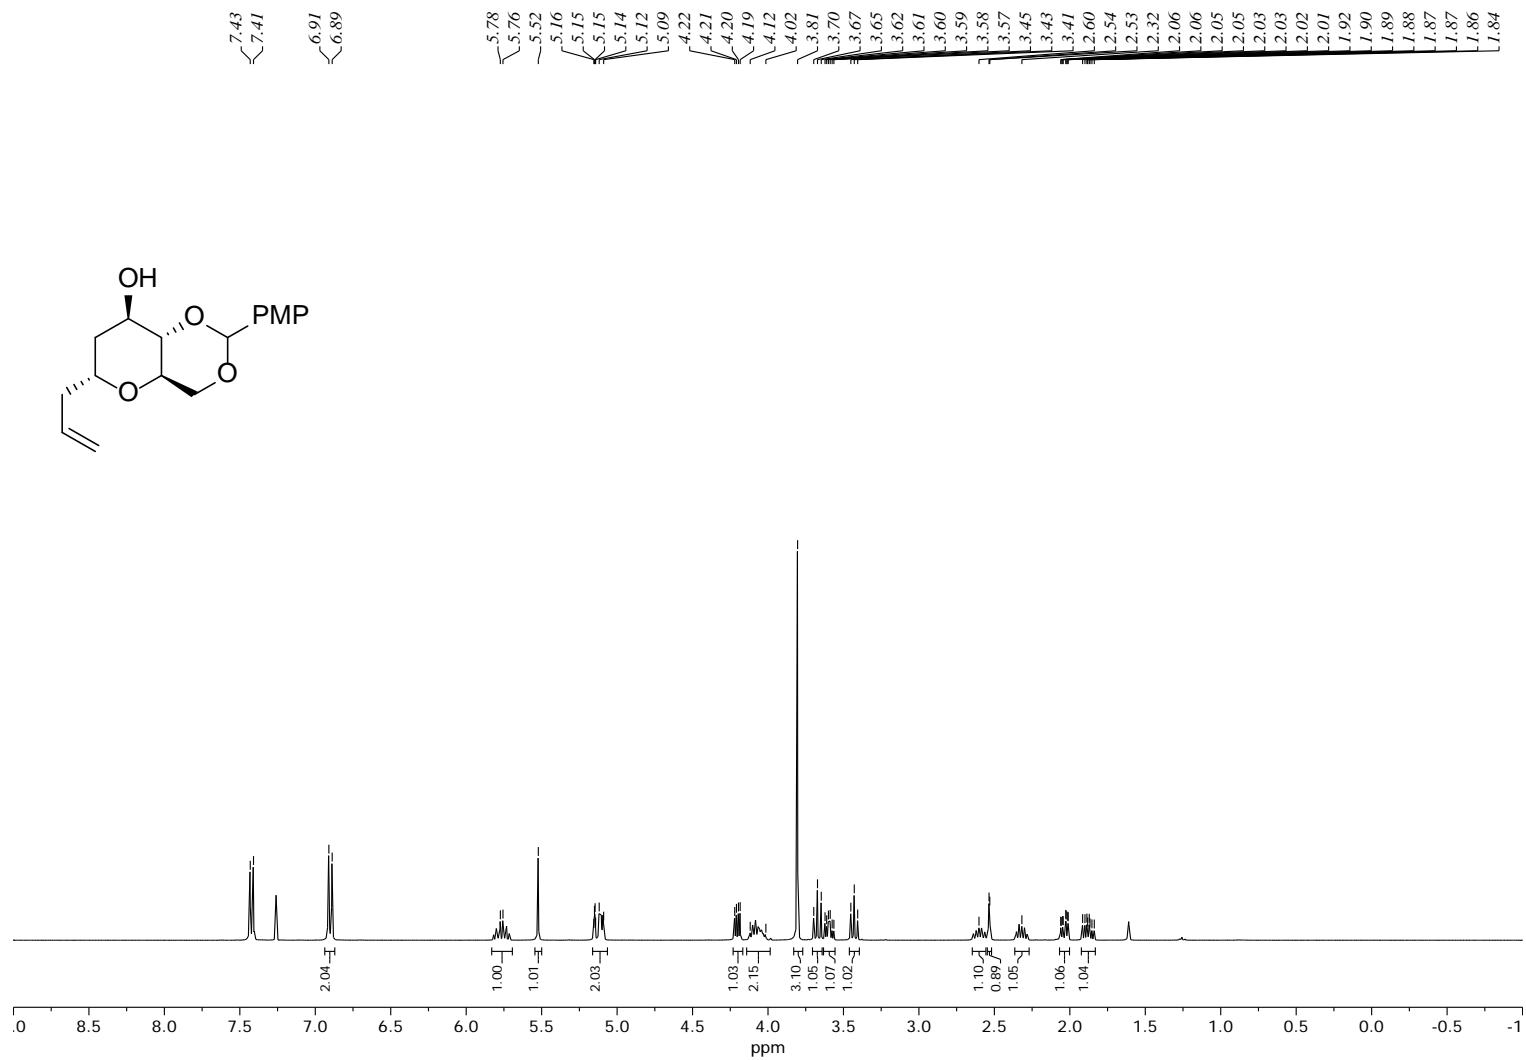

Figure S15.  $^1\text{H NMR}$  (400 MHz,  $\text{CDCl}_3$ ) of Benzylidene Acetal **23**



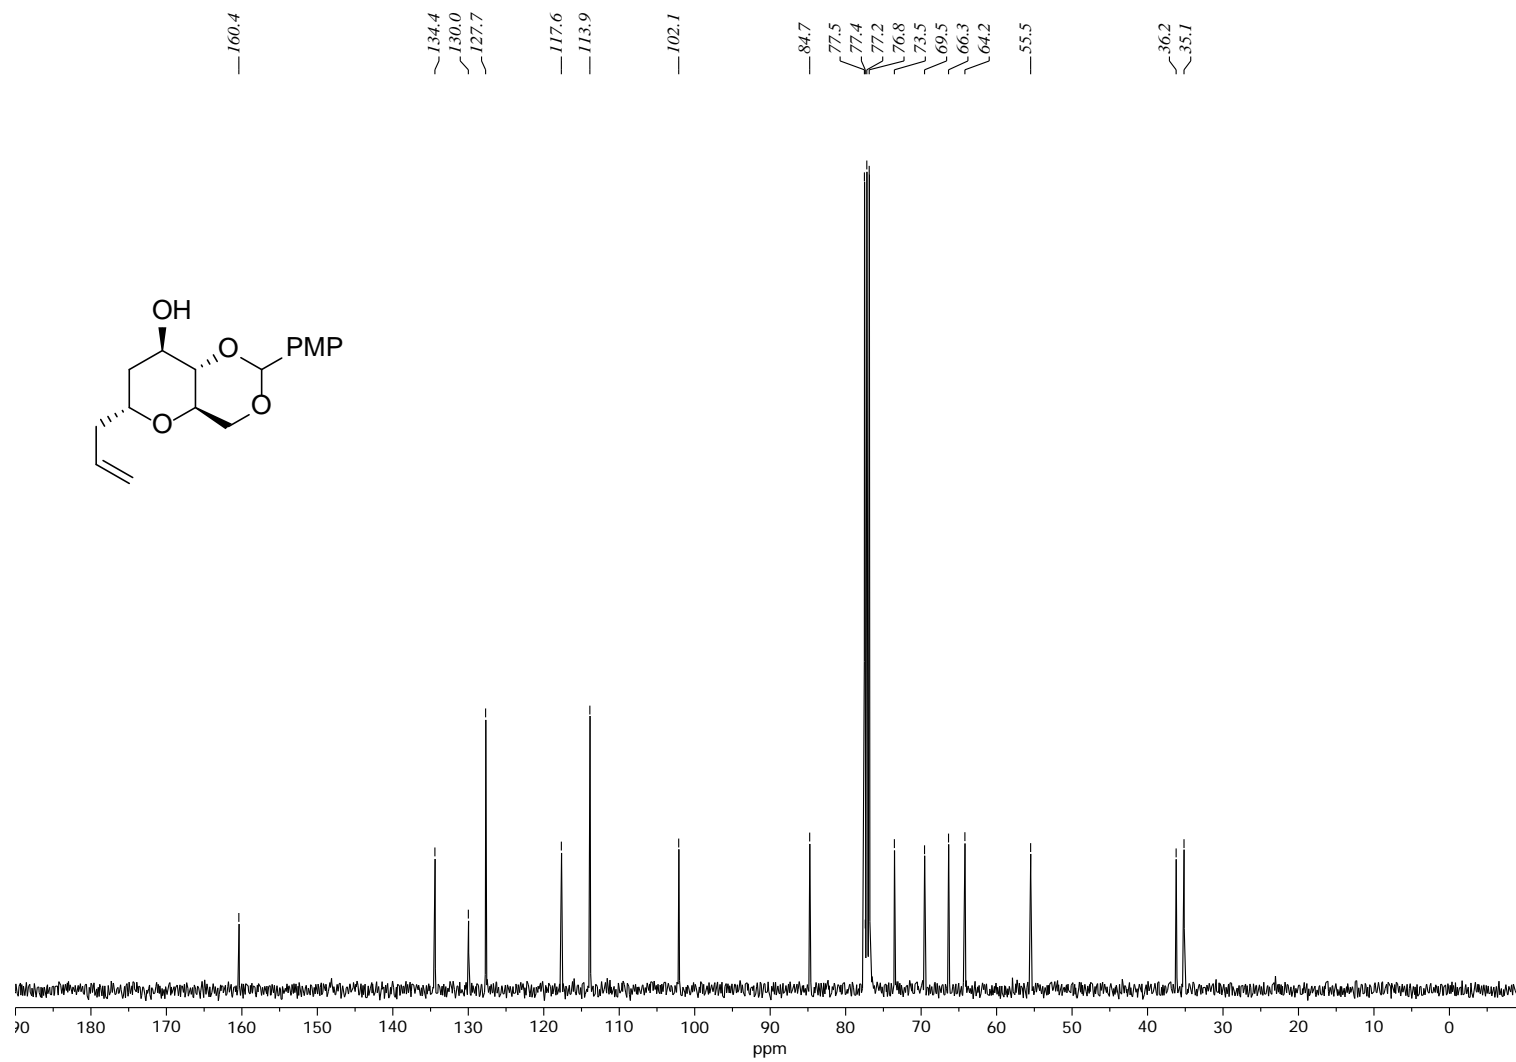

Figure S16. <sup>13</sup>C NMR (100 MHz, CDCl<sub>3</sub>) of Benzylidene Acetal **23**

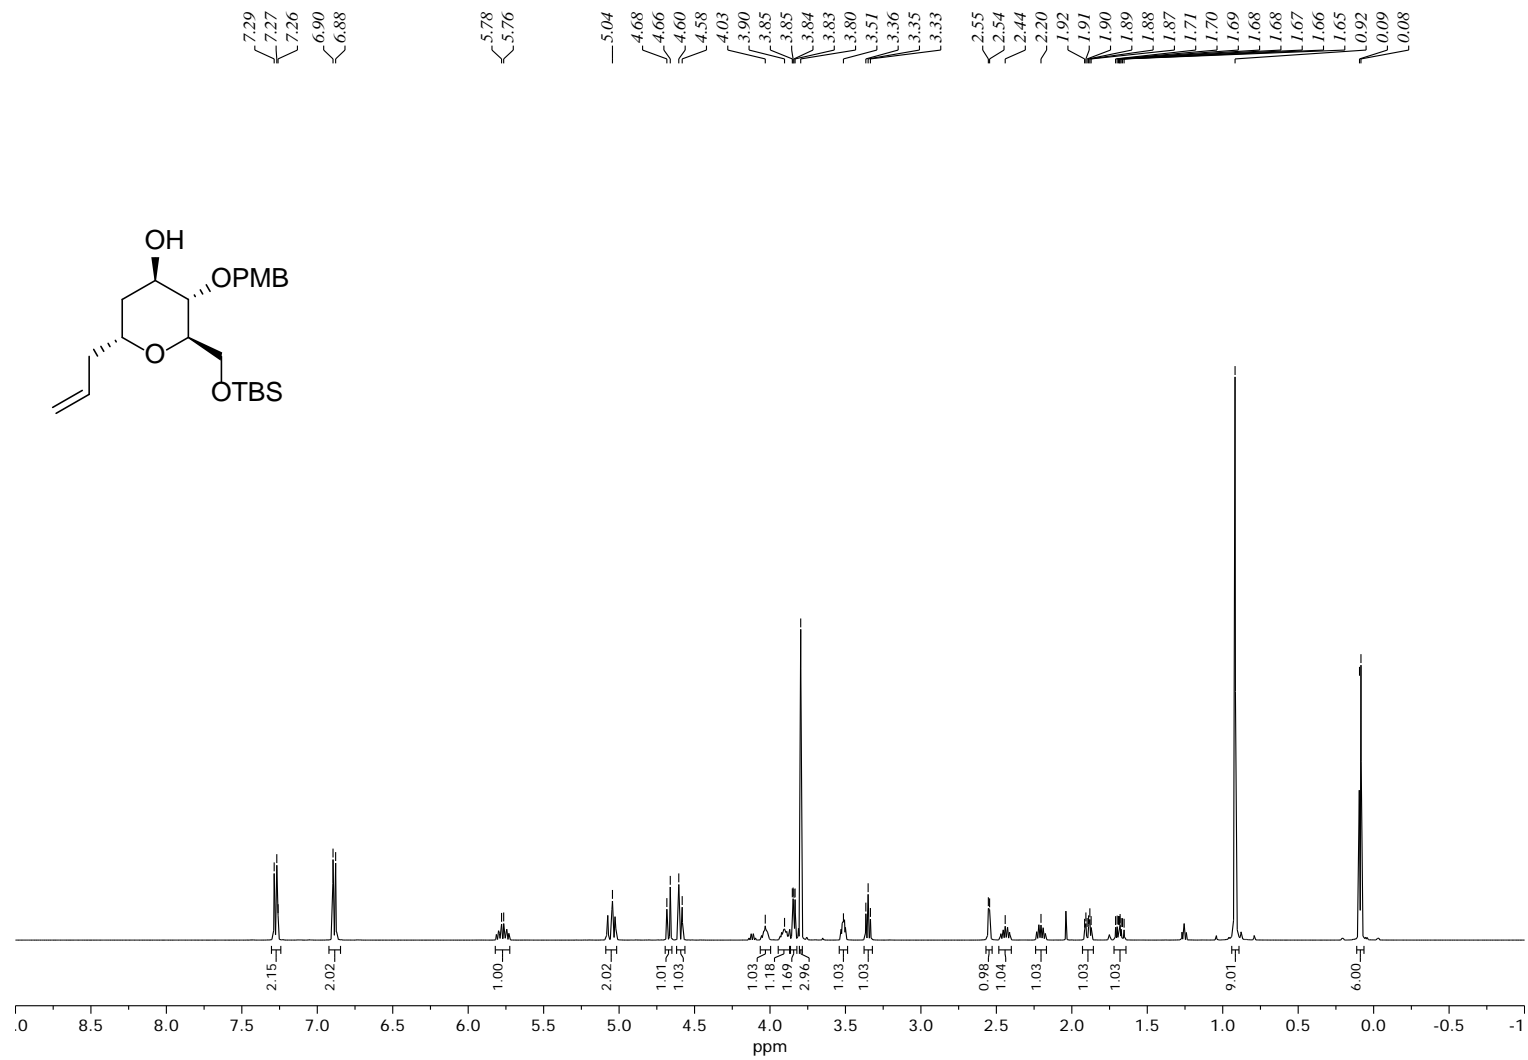

Figure S17. <sup>1</sup>H NMR (500 MHz, CDCl<sub>3</sub>) of Silyl Ether **24**

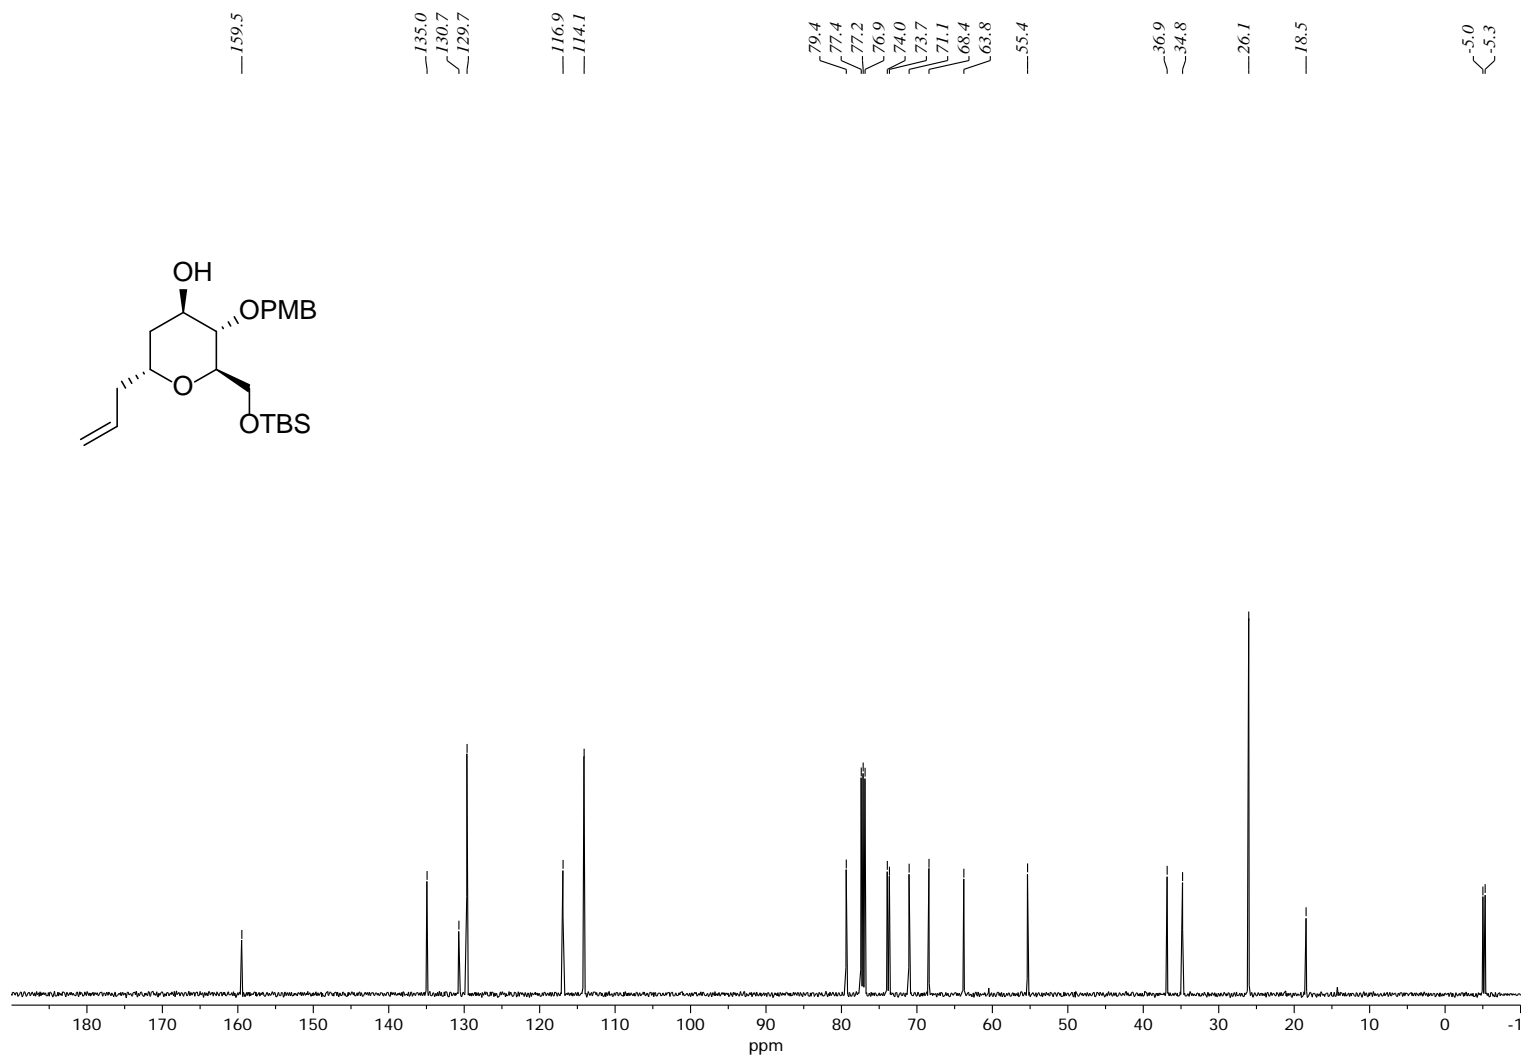

Figure S18.  $^{13}\text{C}$  NMR (125 MHz,  $\text{CDCl}_3$ ) of Silyl Ether **24**

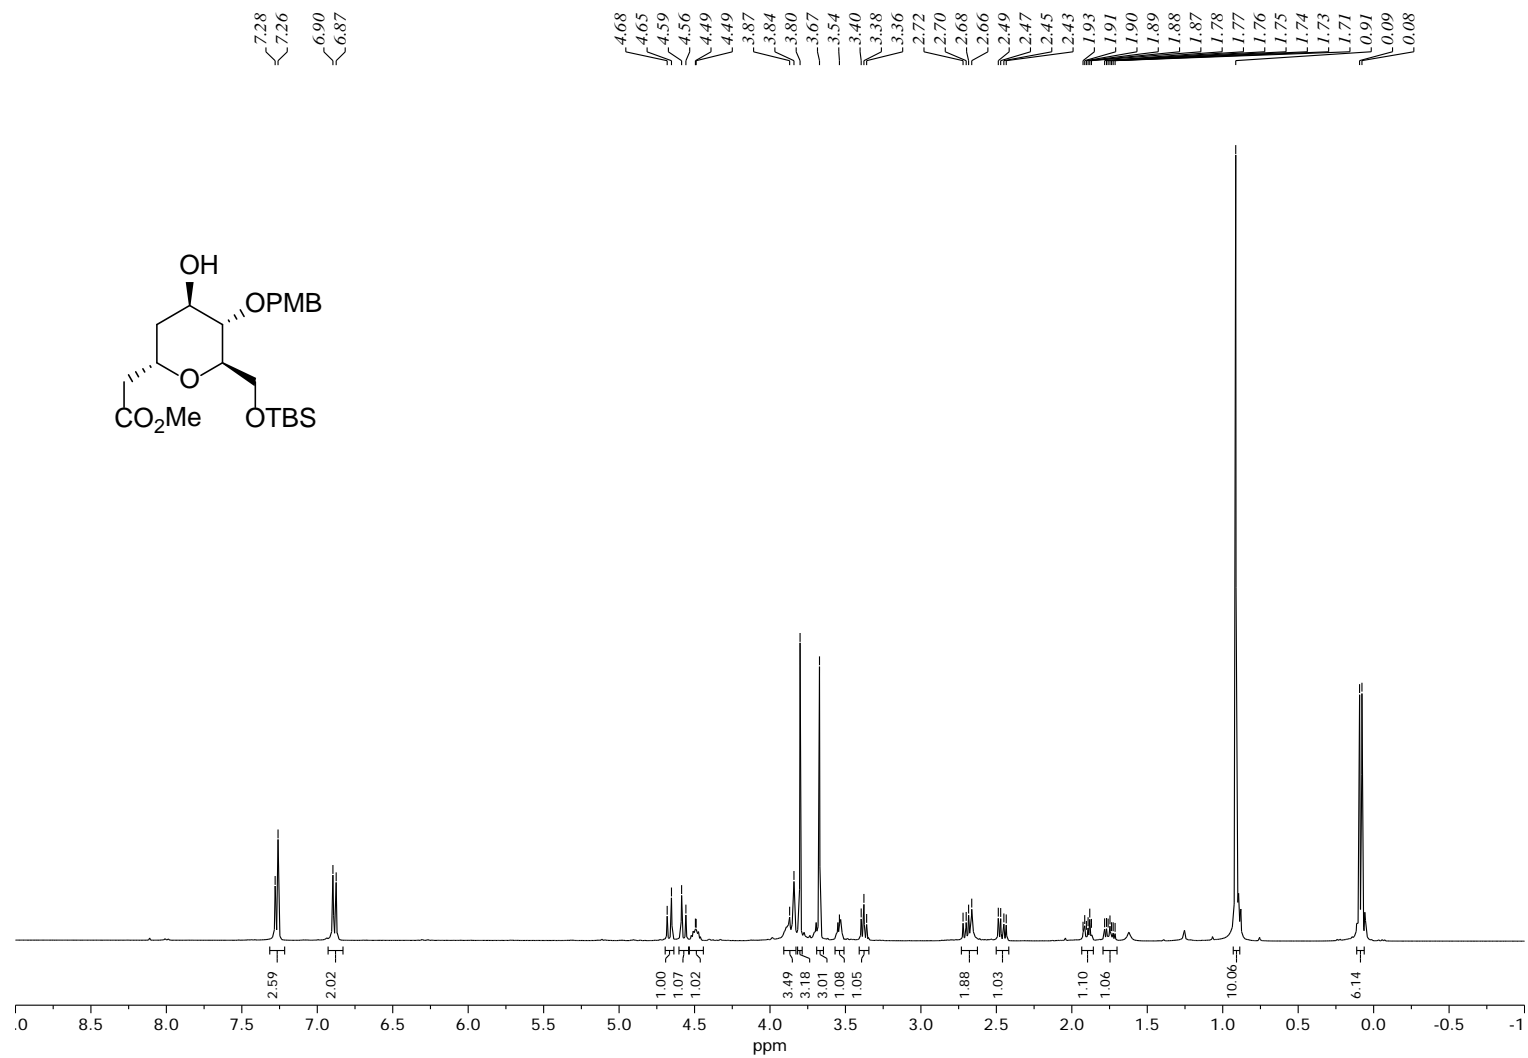

Figure S19. <sup>1</sup>H NMR (400 MHz, CDCl<sub>3</sub>) of Methyl Ester **25**

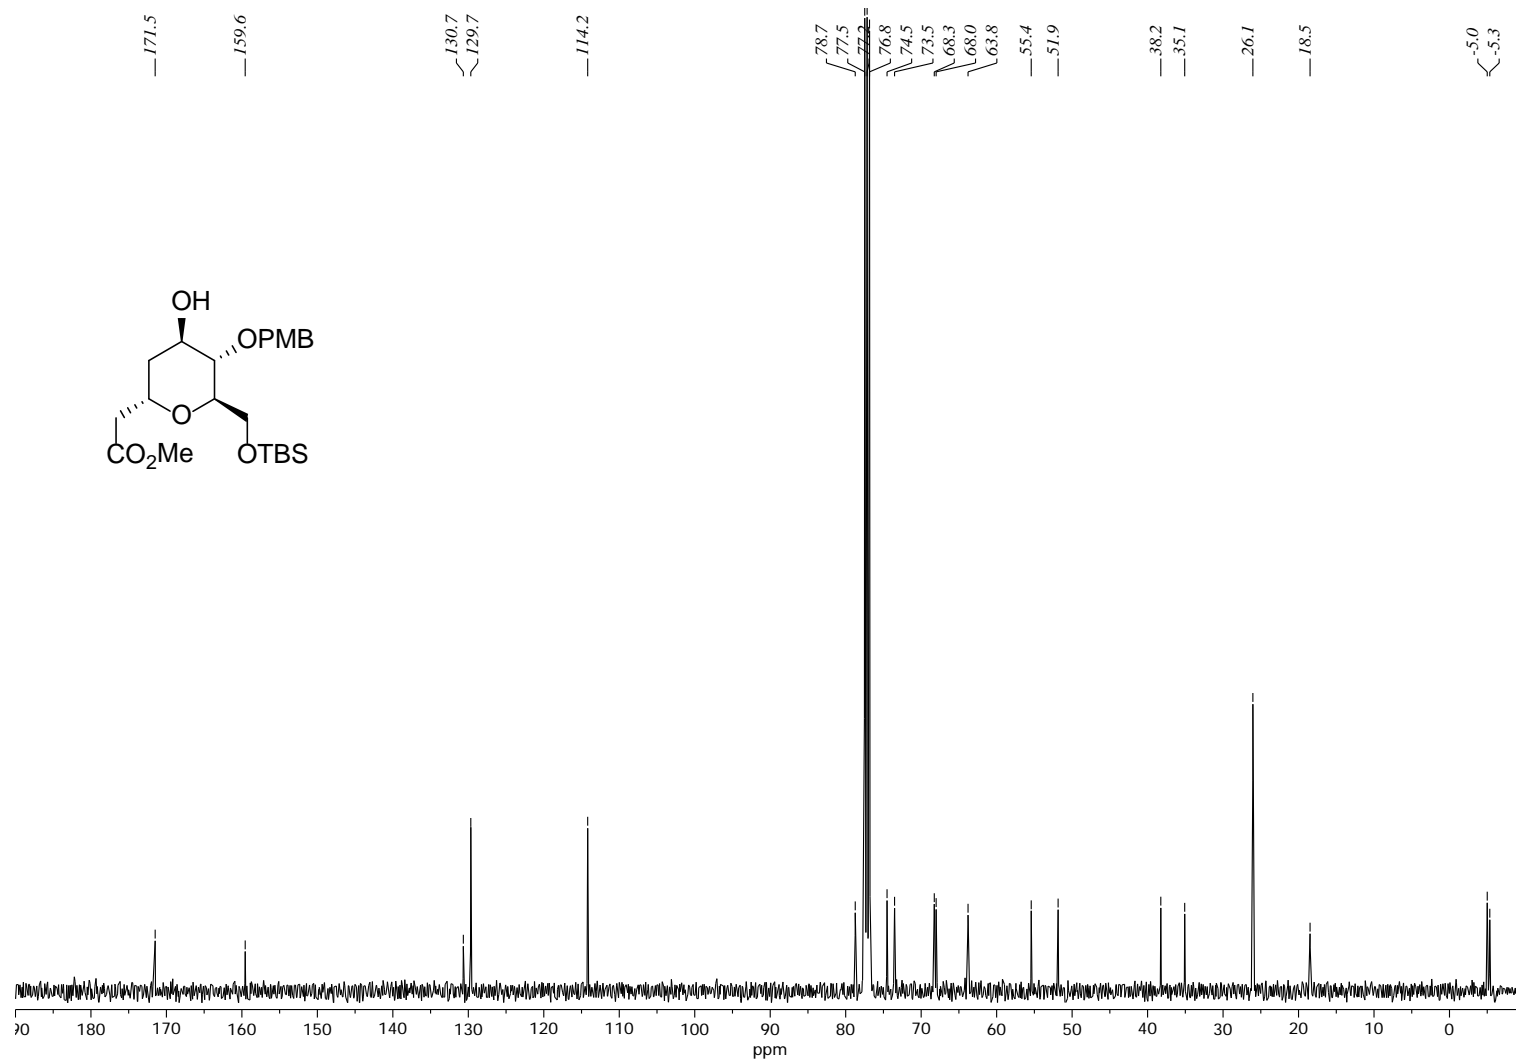

Figure S20. <sup>13</sup>C NMR (100 MHz, CDCl<sub>3</sub>) of Methyl Ester **25**

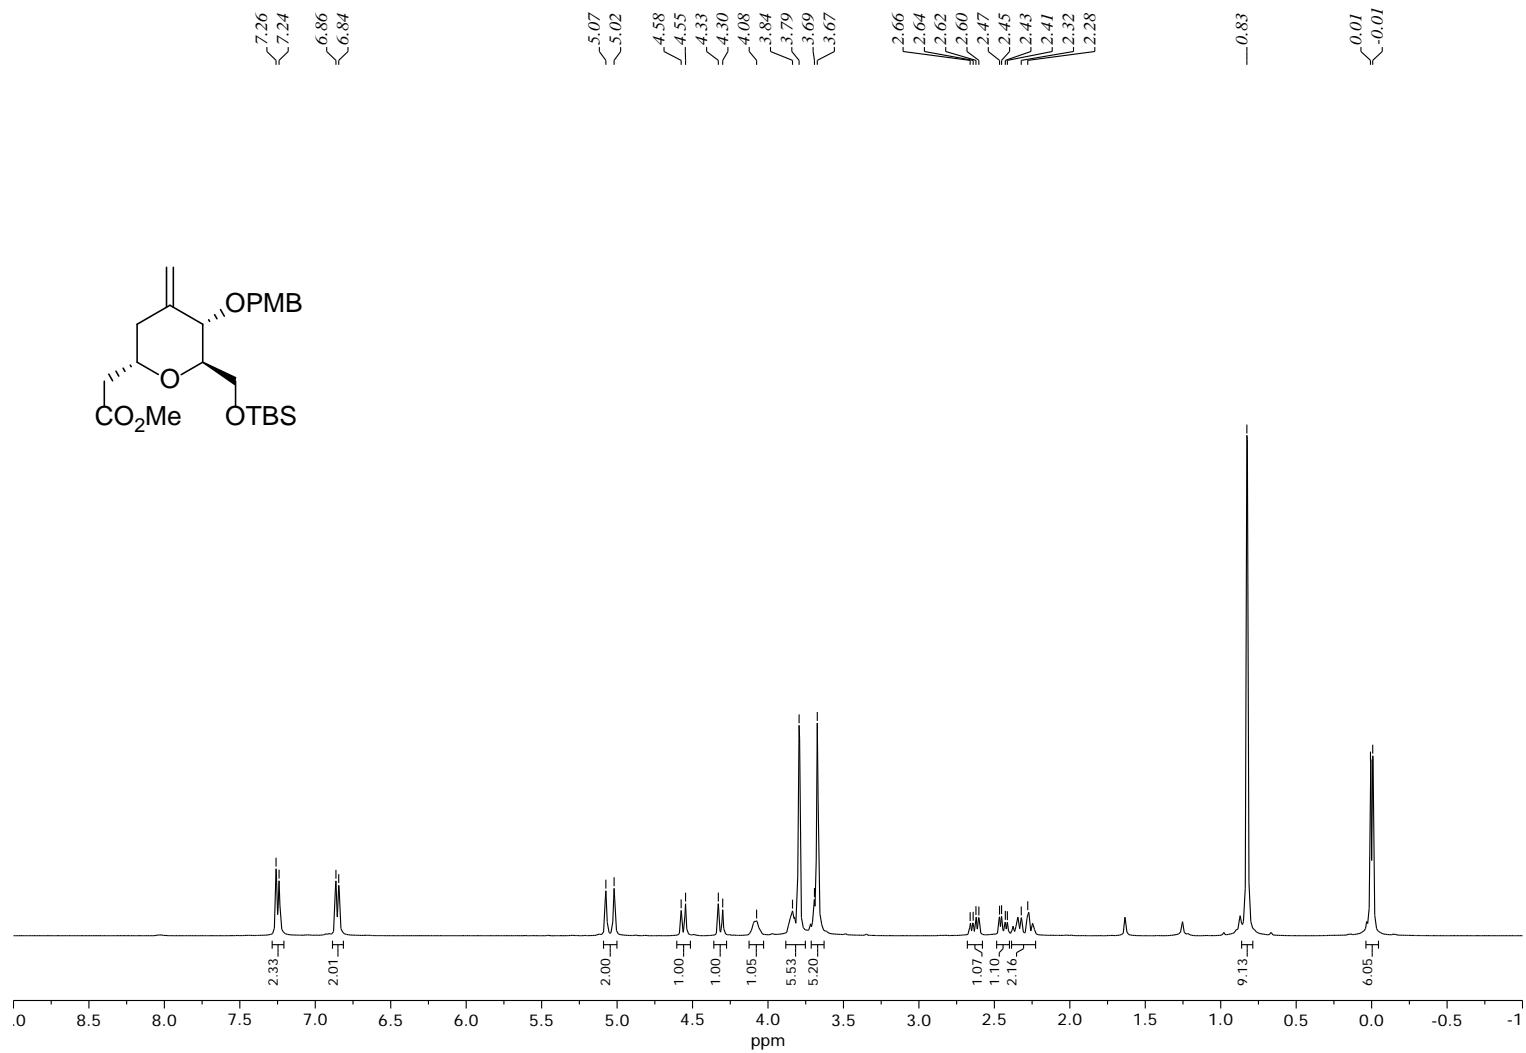

Figure S21. <sup>1</sup>H NMR (400 MHz, CDCl<sub>3</sub>) of Olefin 26

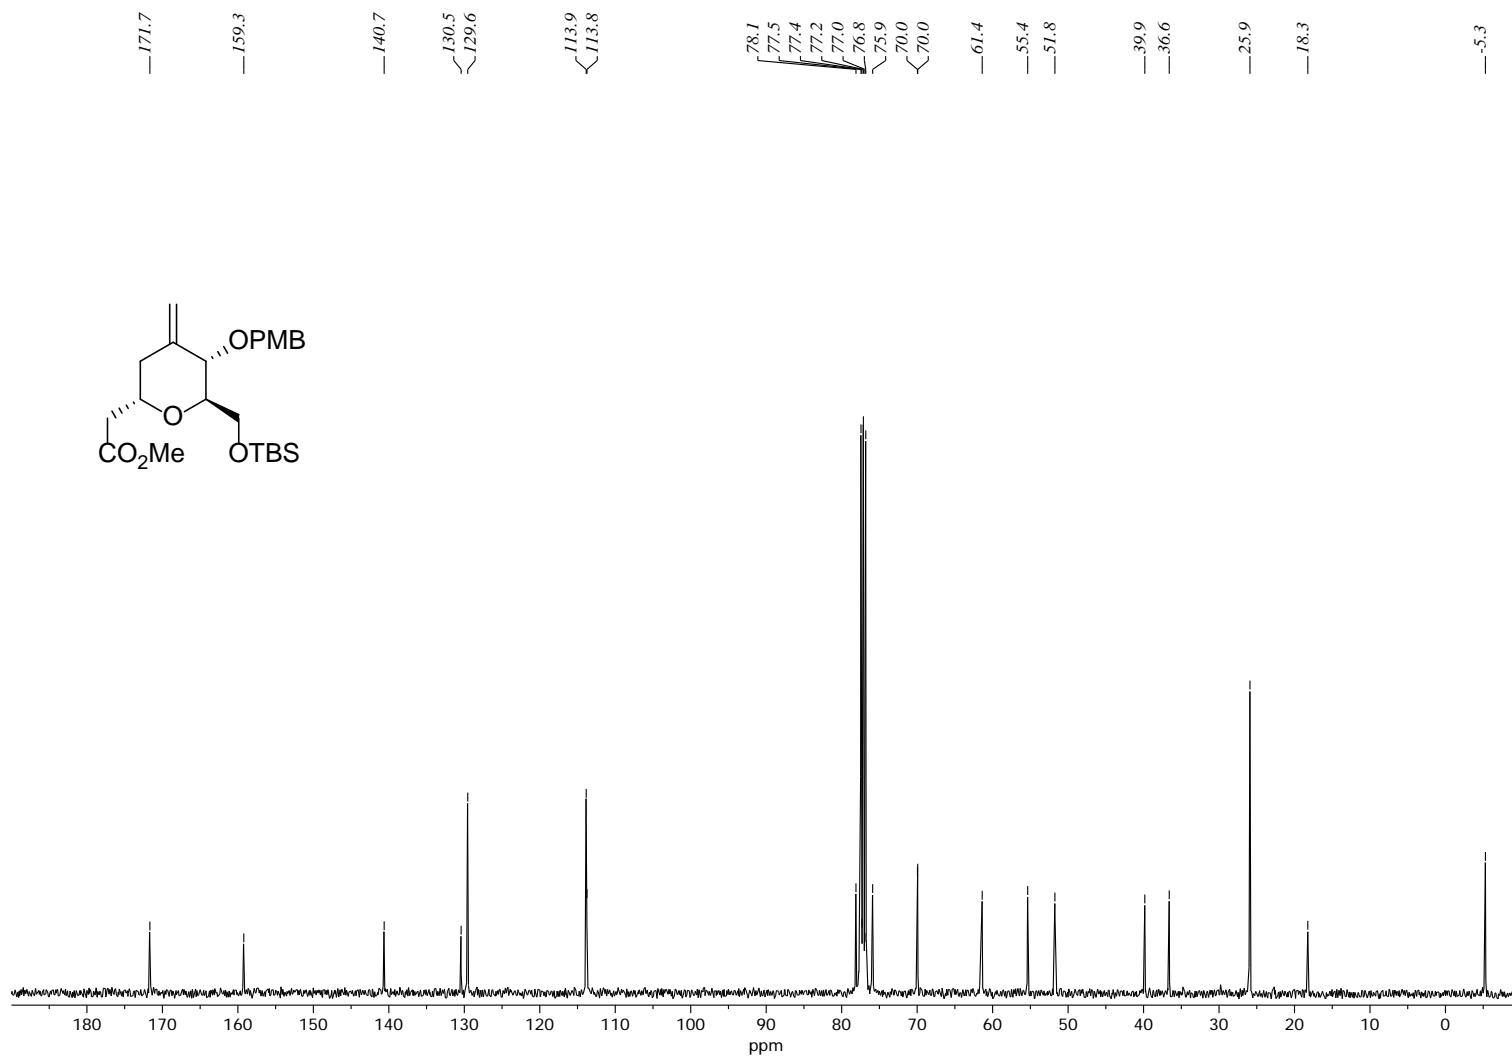

Figure S22.  $^{13}\text{C}$  NMR (100 MHz,  $\text{CDCl}_3$ ) of Olefin **26**

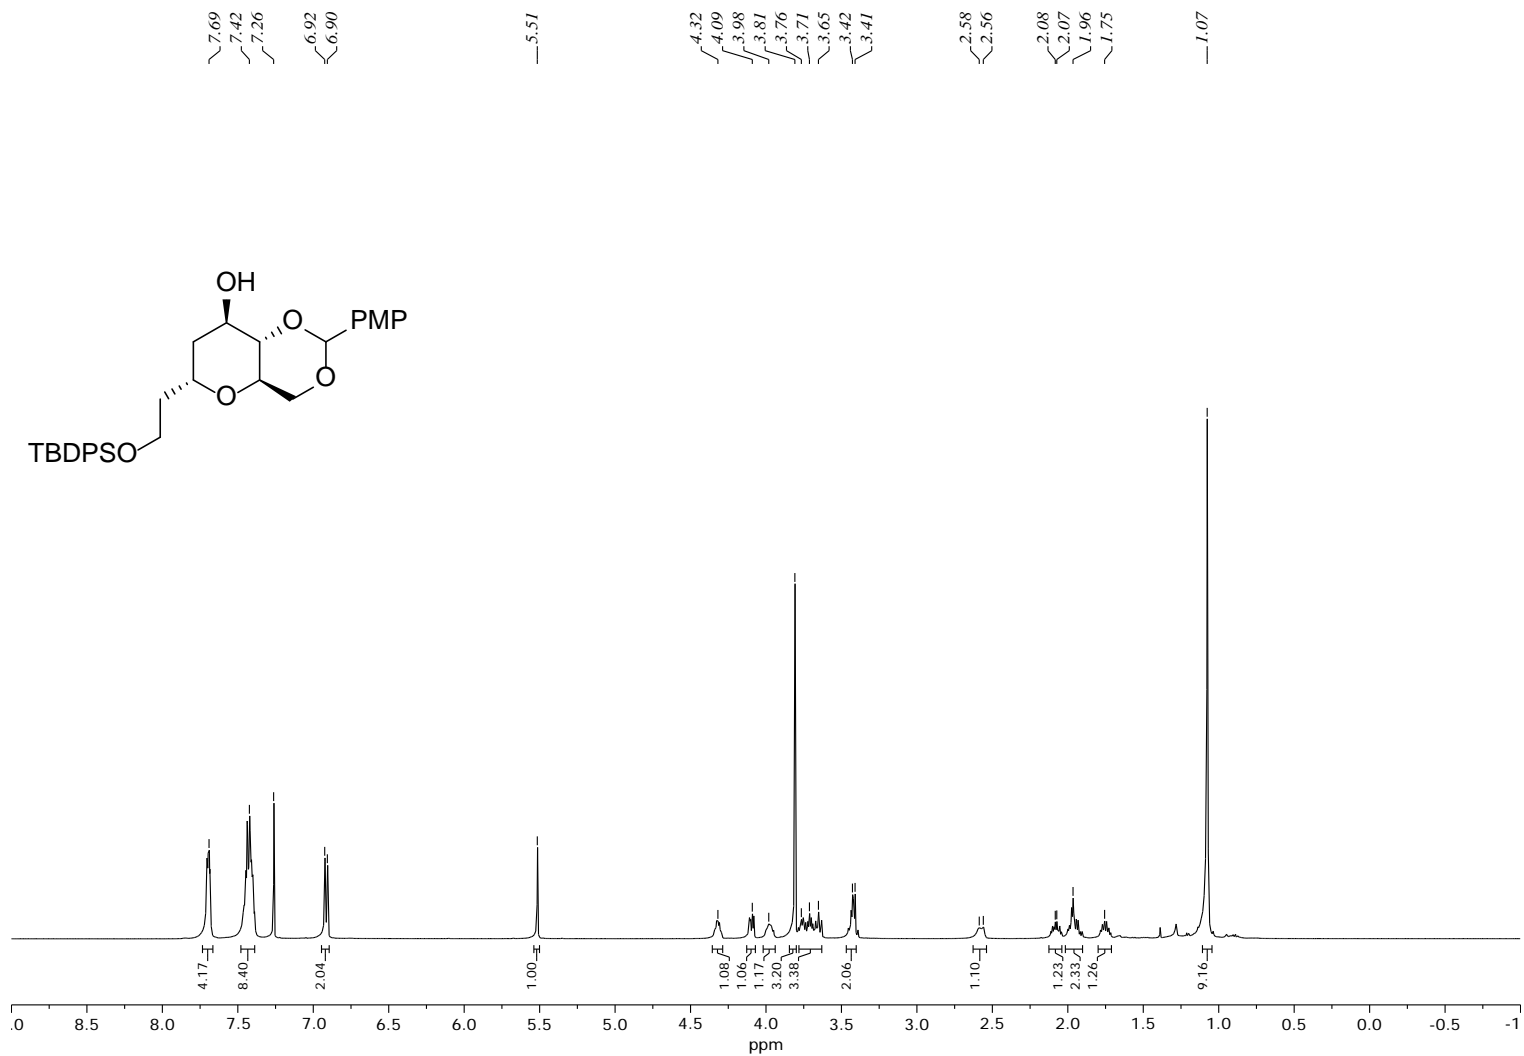

Figure S23.  $^1\text{H}$  NMR (500 MHz,  $\text{CDCl}_3$ ) of Silyl Ether **29**





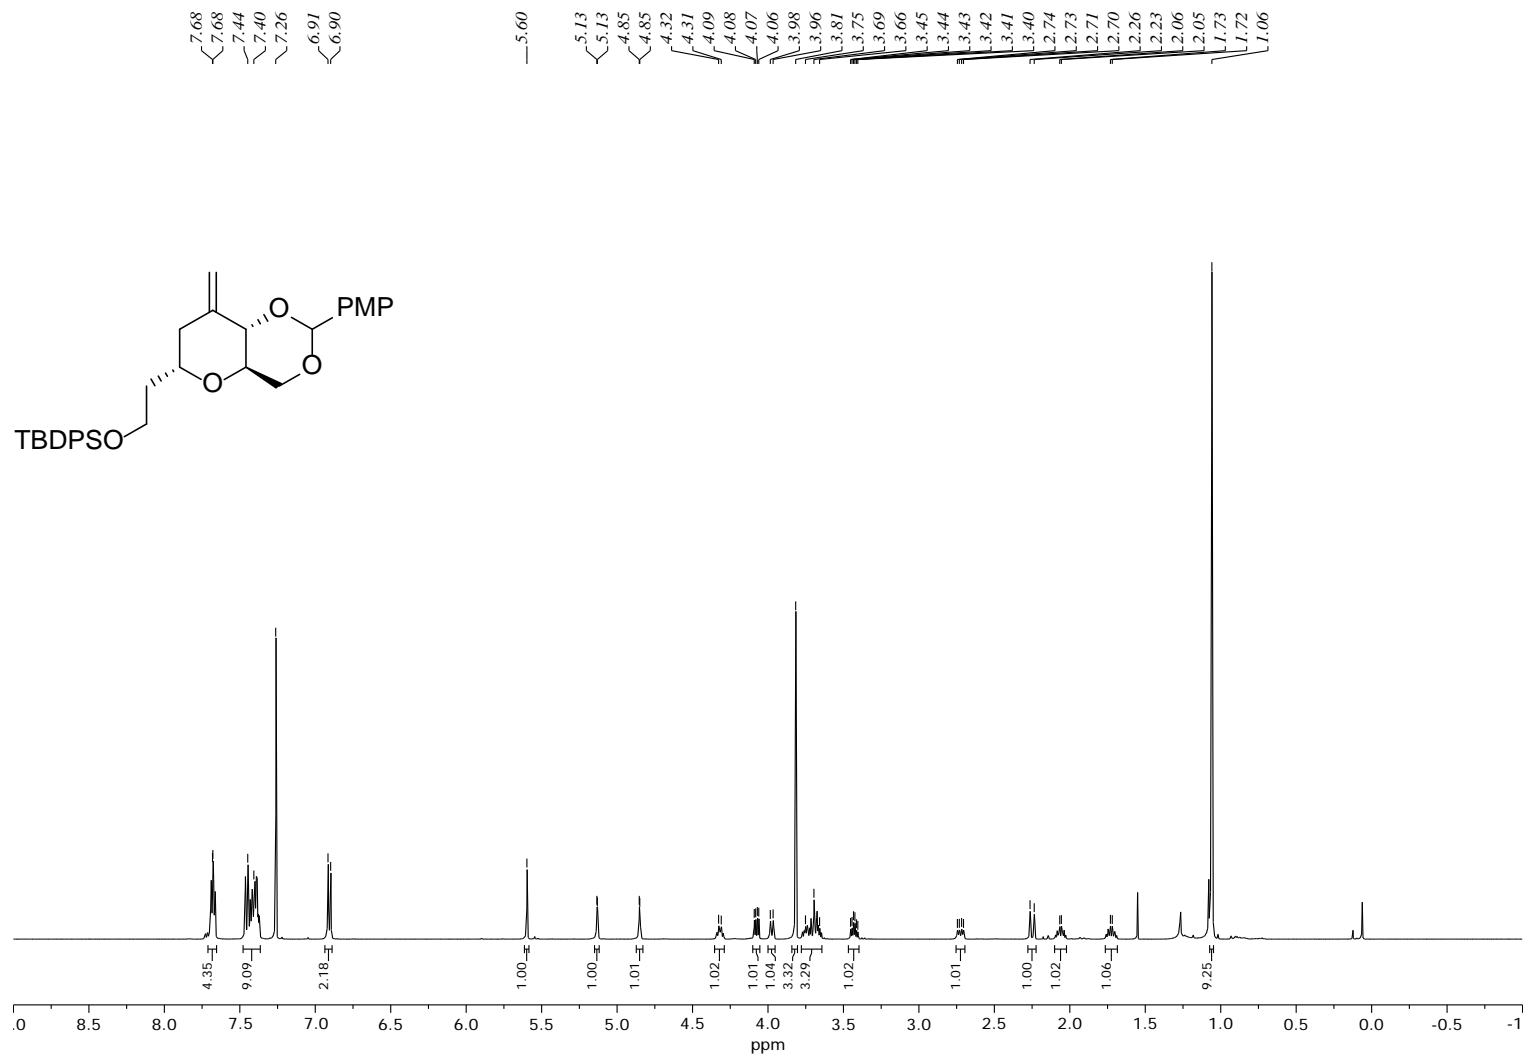

Figure S25. <sup>1</sup>H NMR (500 MHz, CDCl<sub>3</sub>) of Olefin **30**



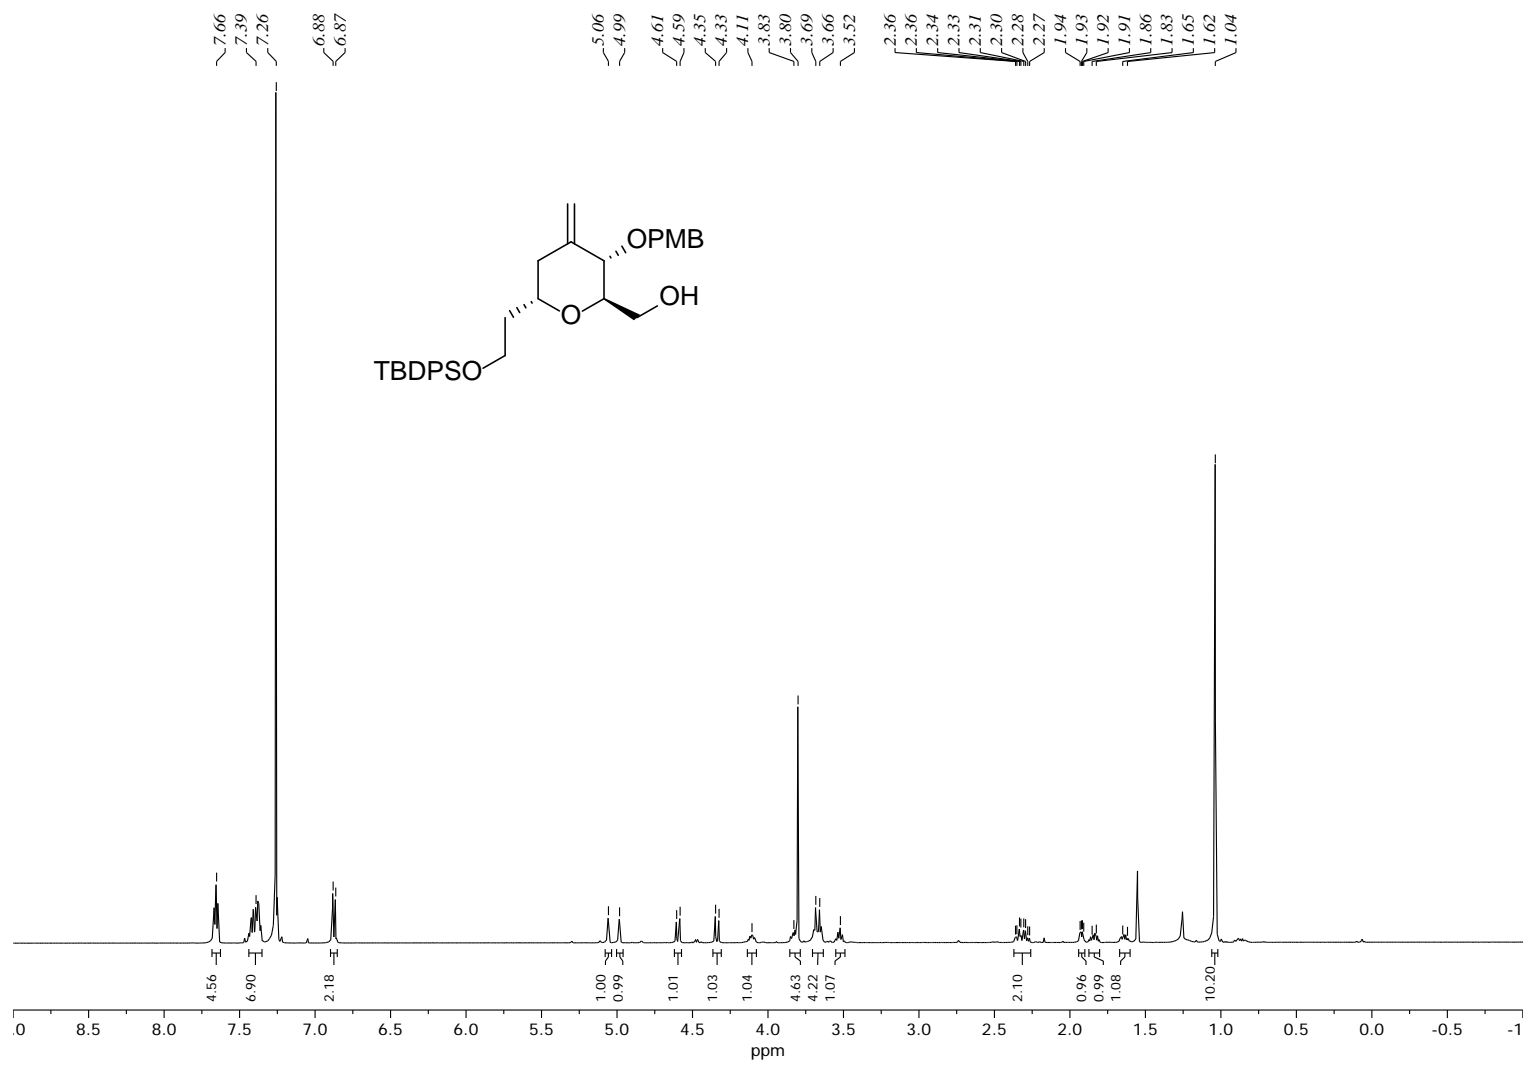

Figure S27. <sup>1</sup>H NMR (500 MHz, CDCl<sub>3</sub>) of Alcohol **31**



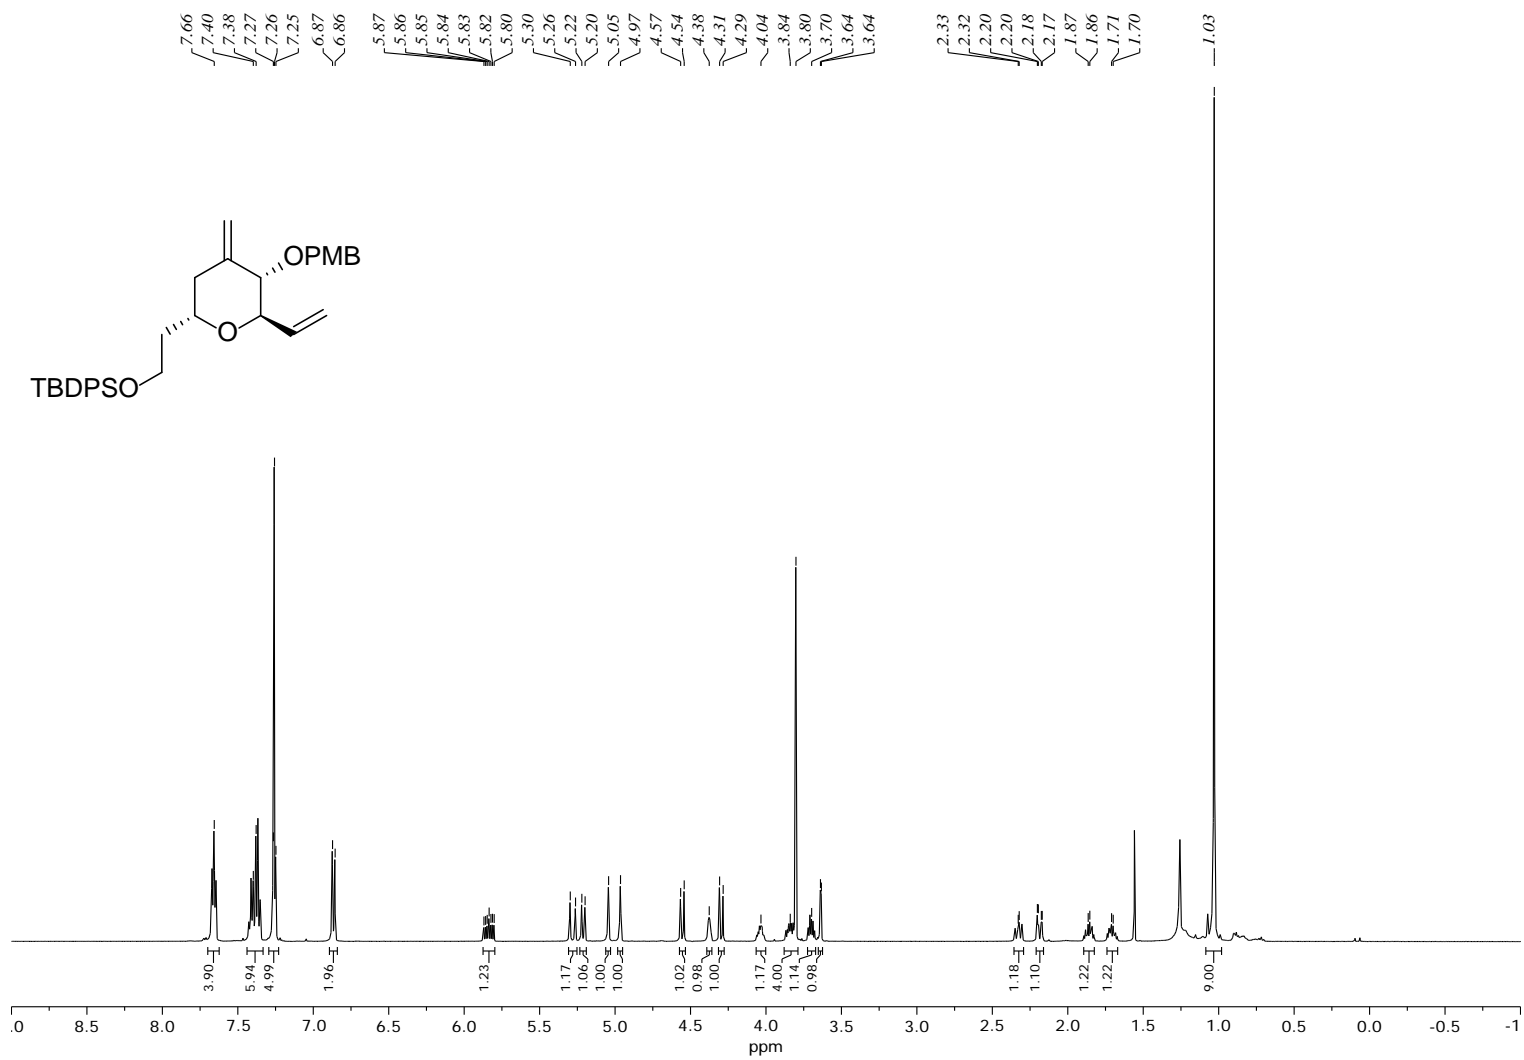

Figure S29. <sup>1</sup>H NMR (500 MHz, CDCl<sub>3</sub>) of Olefin **32**



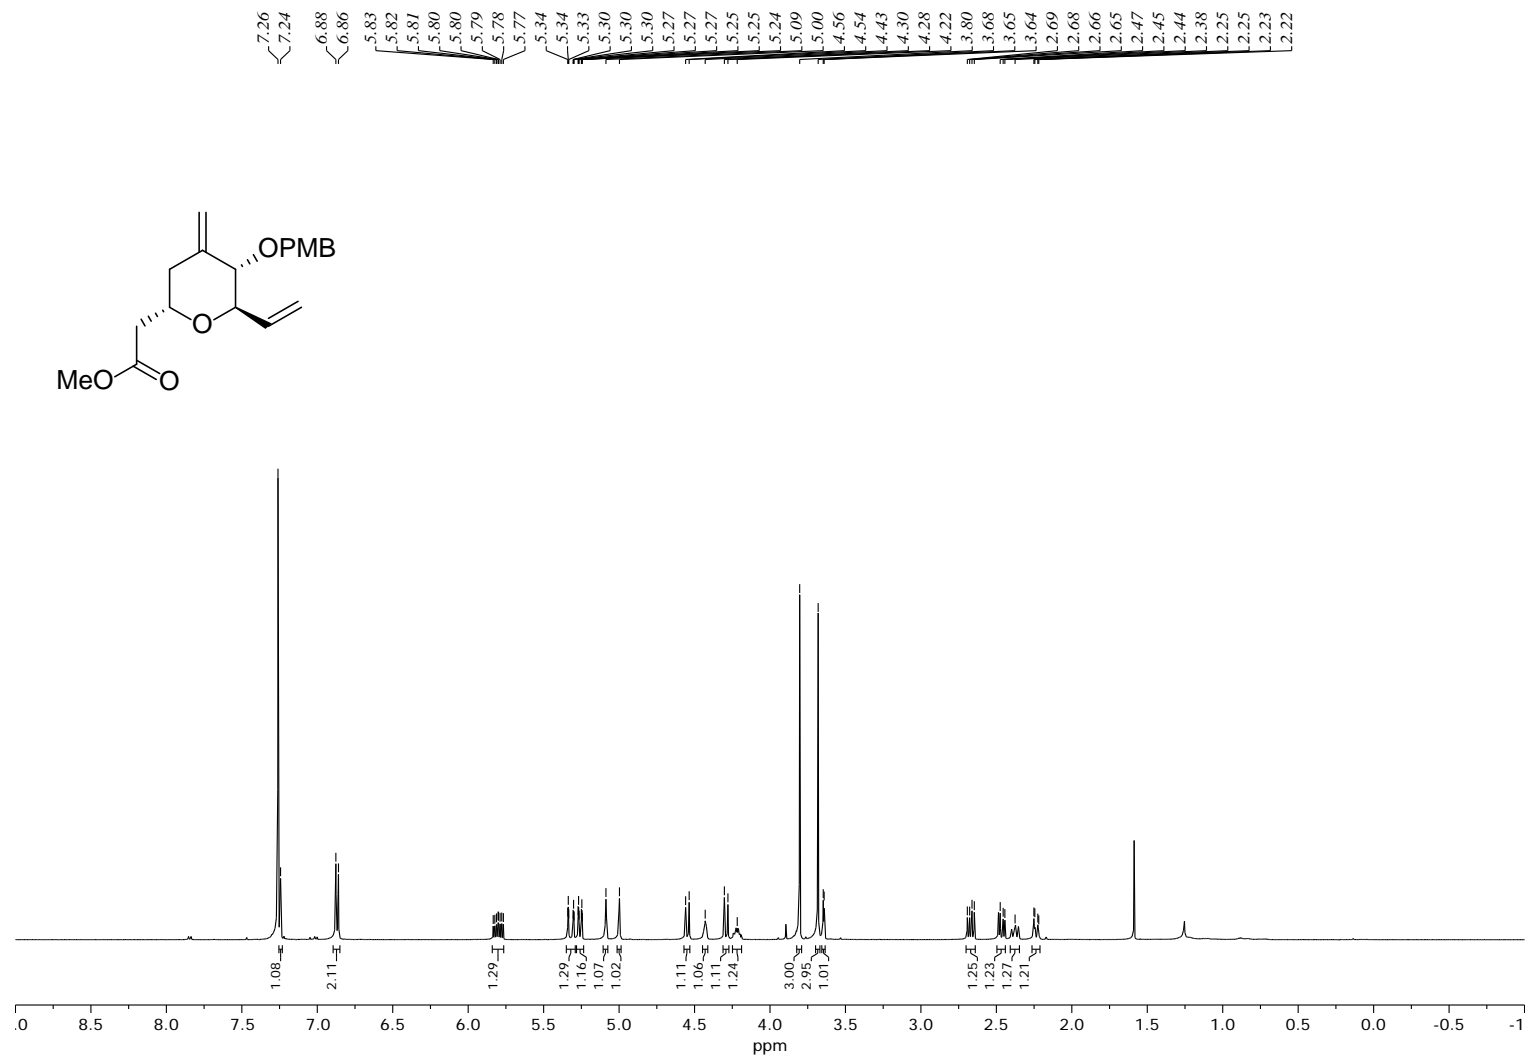

Figure S31.  $^1\text{H}$  NMR (500 MHz,  $\text{CDCl}_3$ ) of Methyl Ester **27**



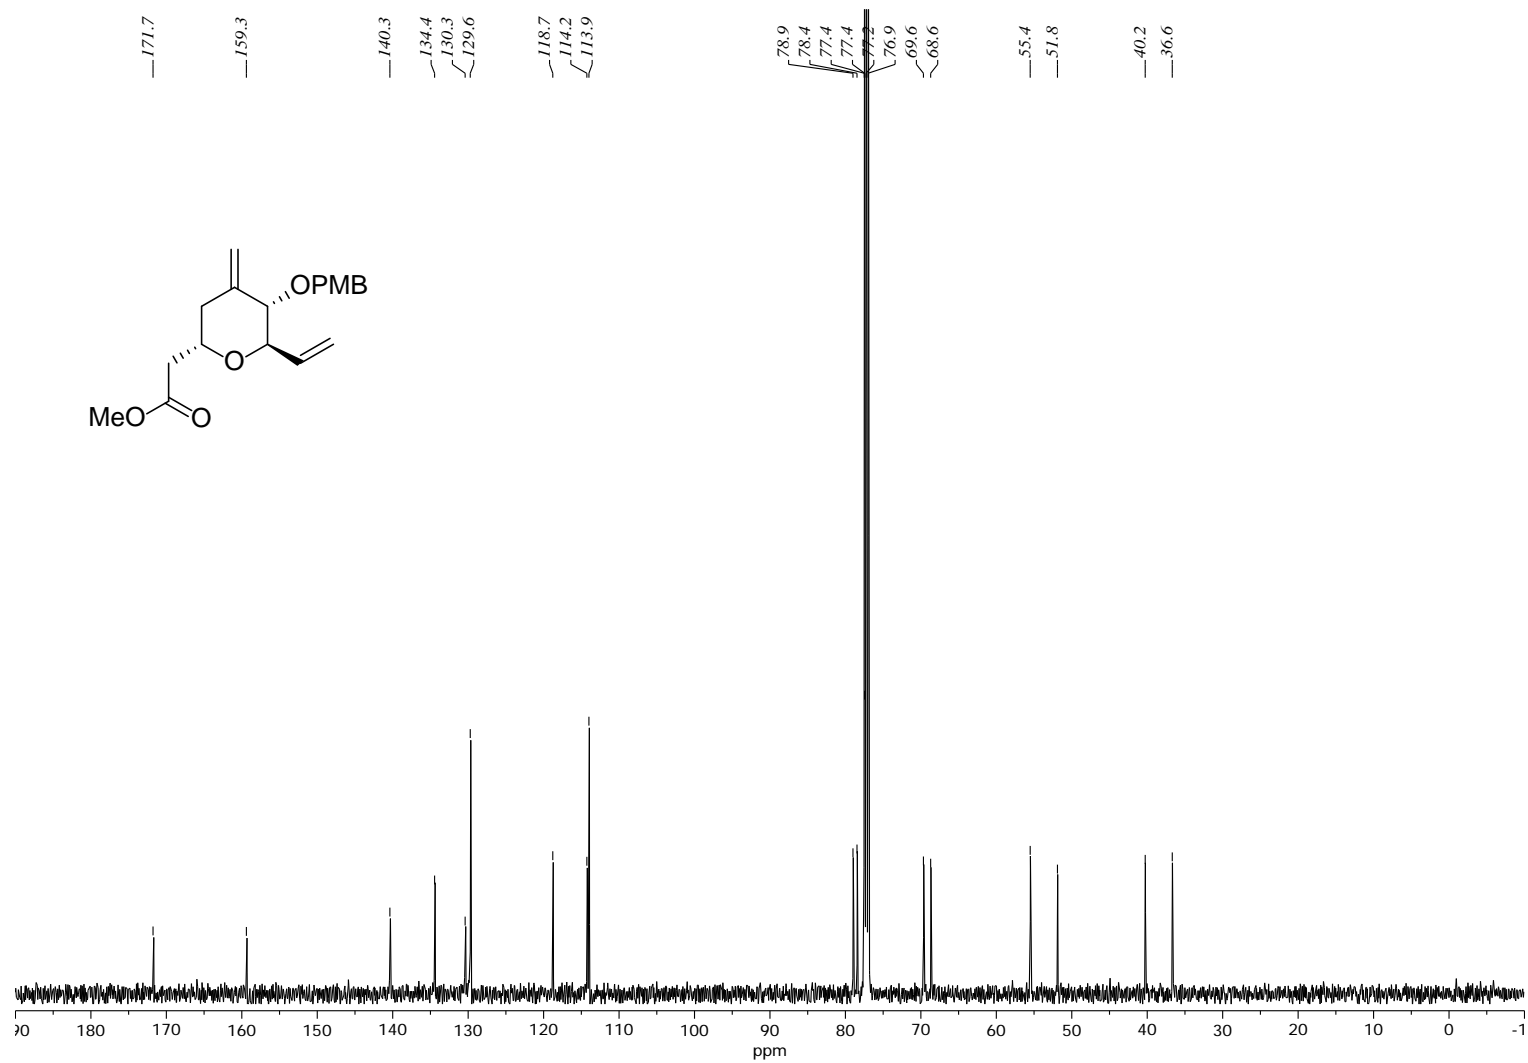

Figure S32. <sup>13</sup>C NMR (125 MHz, CDCl<sub>3</sub>) of Methyl Ester **27**

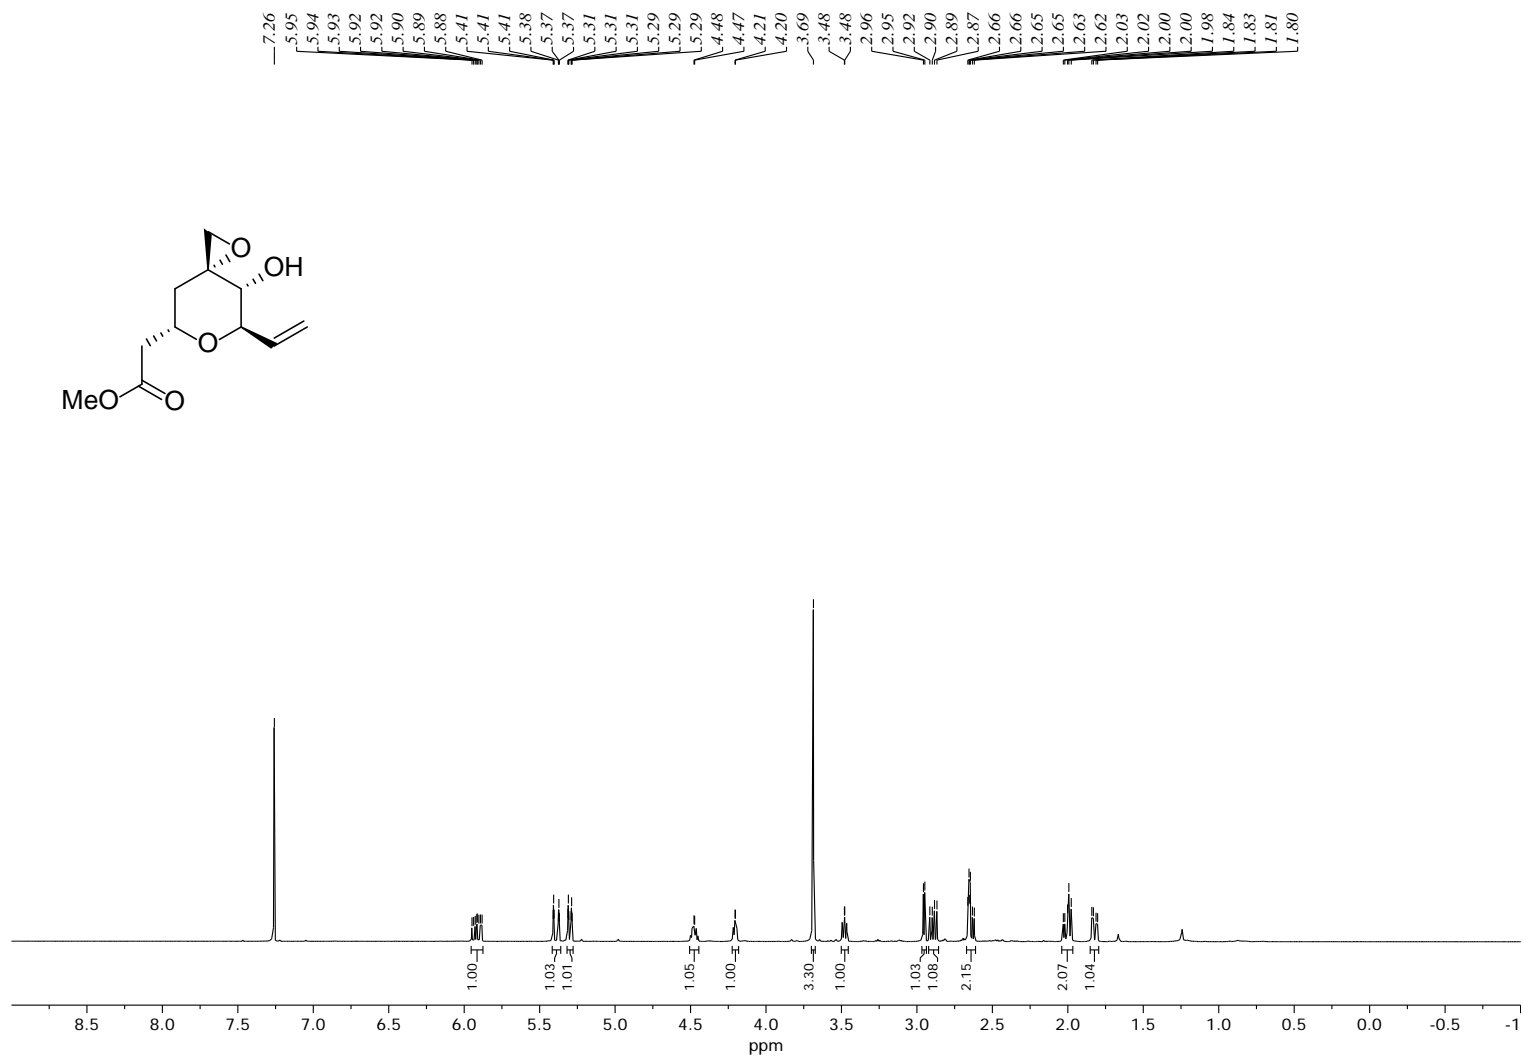

Figure S33. <sup>1</sup>H NMR (500 MHz, CDCl<sub>3</sub>) of Epoxide 8

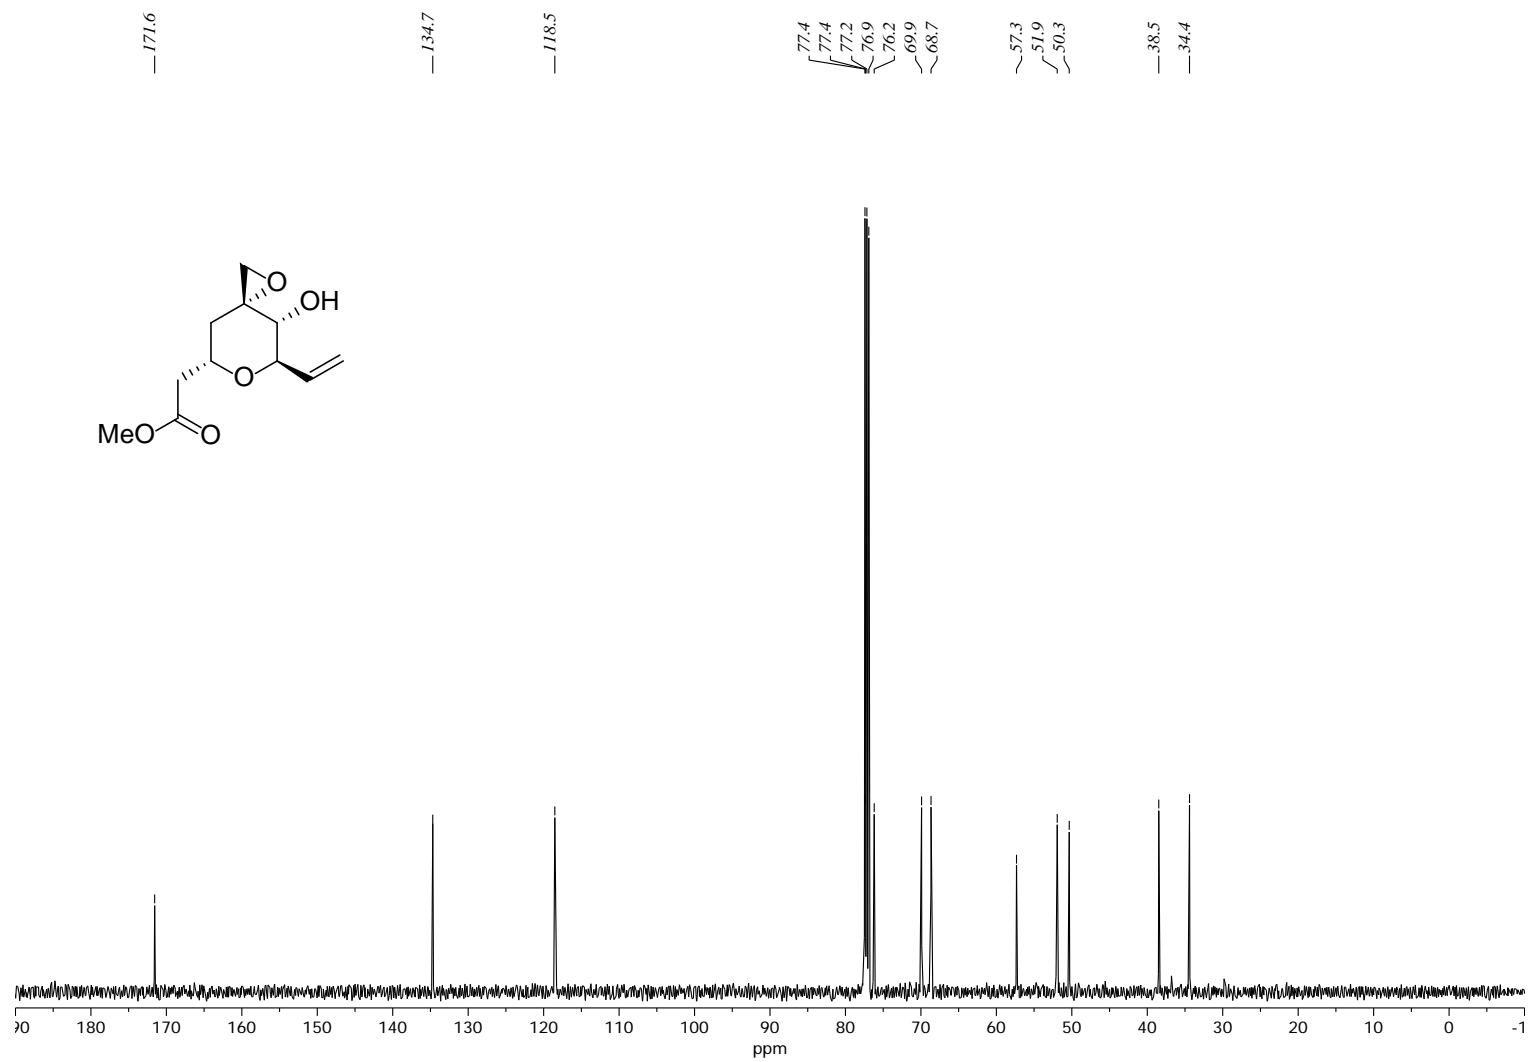

Figure S34. <sup>13</sup>C NMR (125 MHz, CDCl<sub>3</sub>) of Epoxide 8

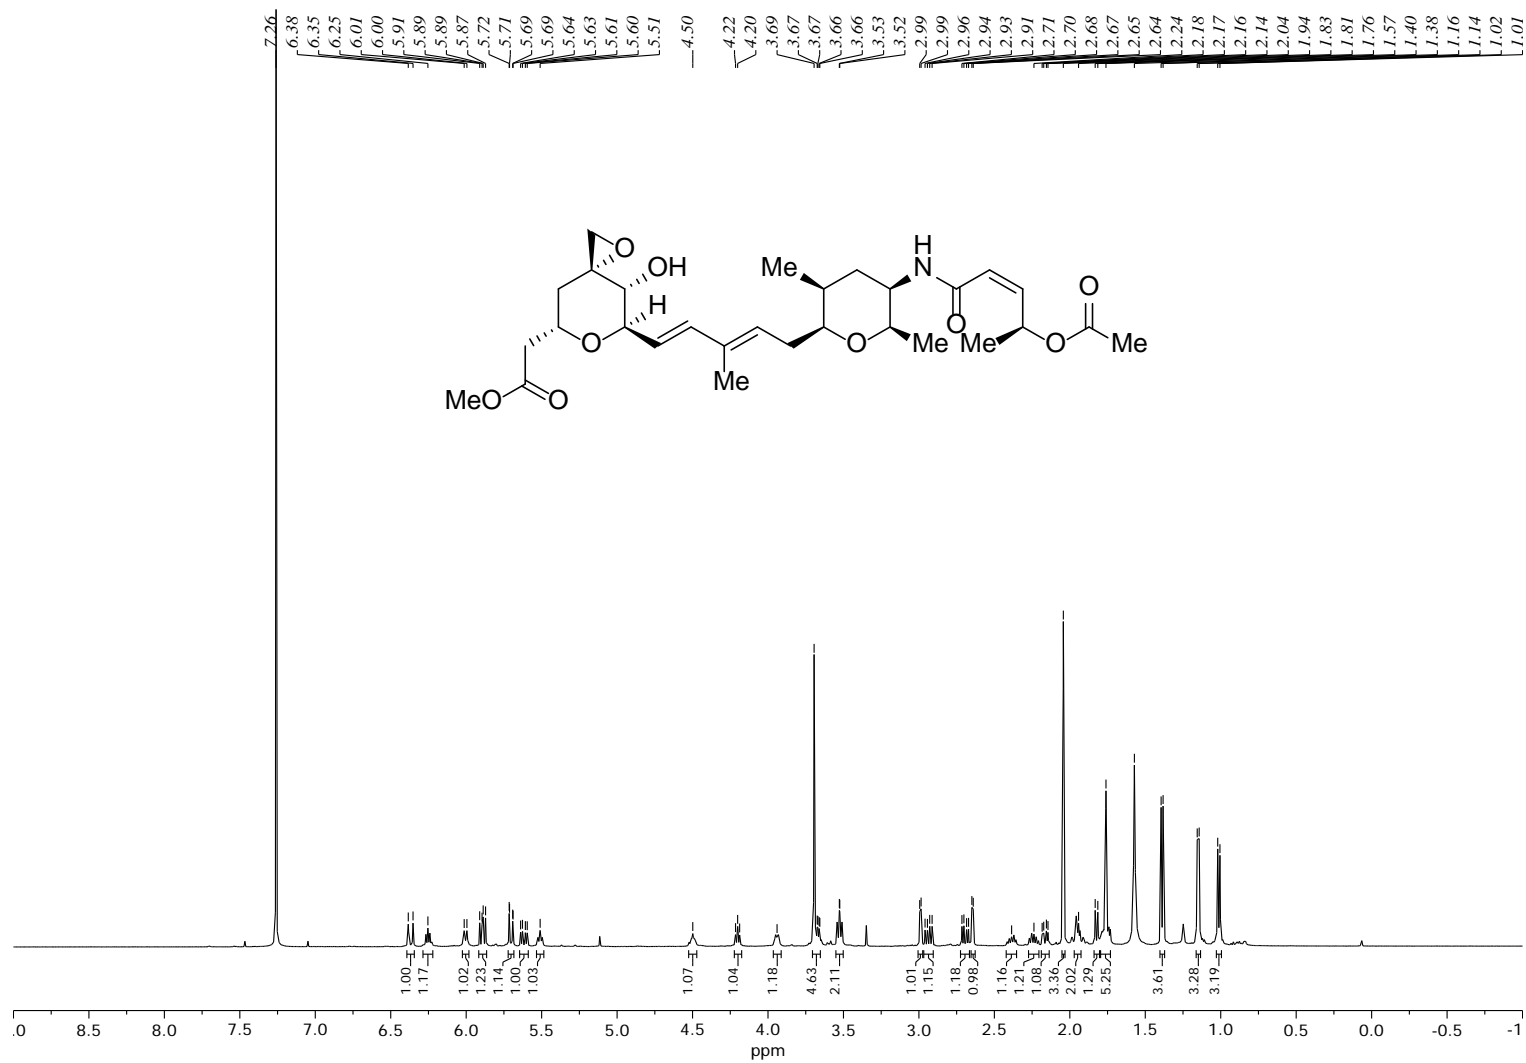

Figure S35. <sup>1</sup>H NMR (500 MHz, CDCl<sub>3</sub>) of Thailanstatin A Methyl Ester (2)

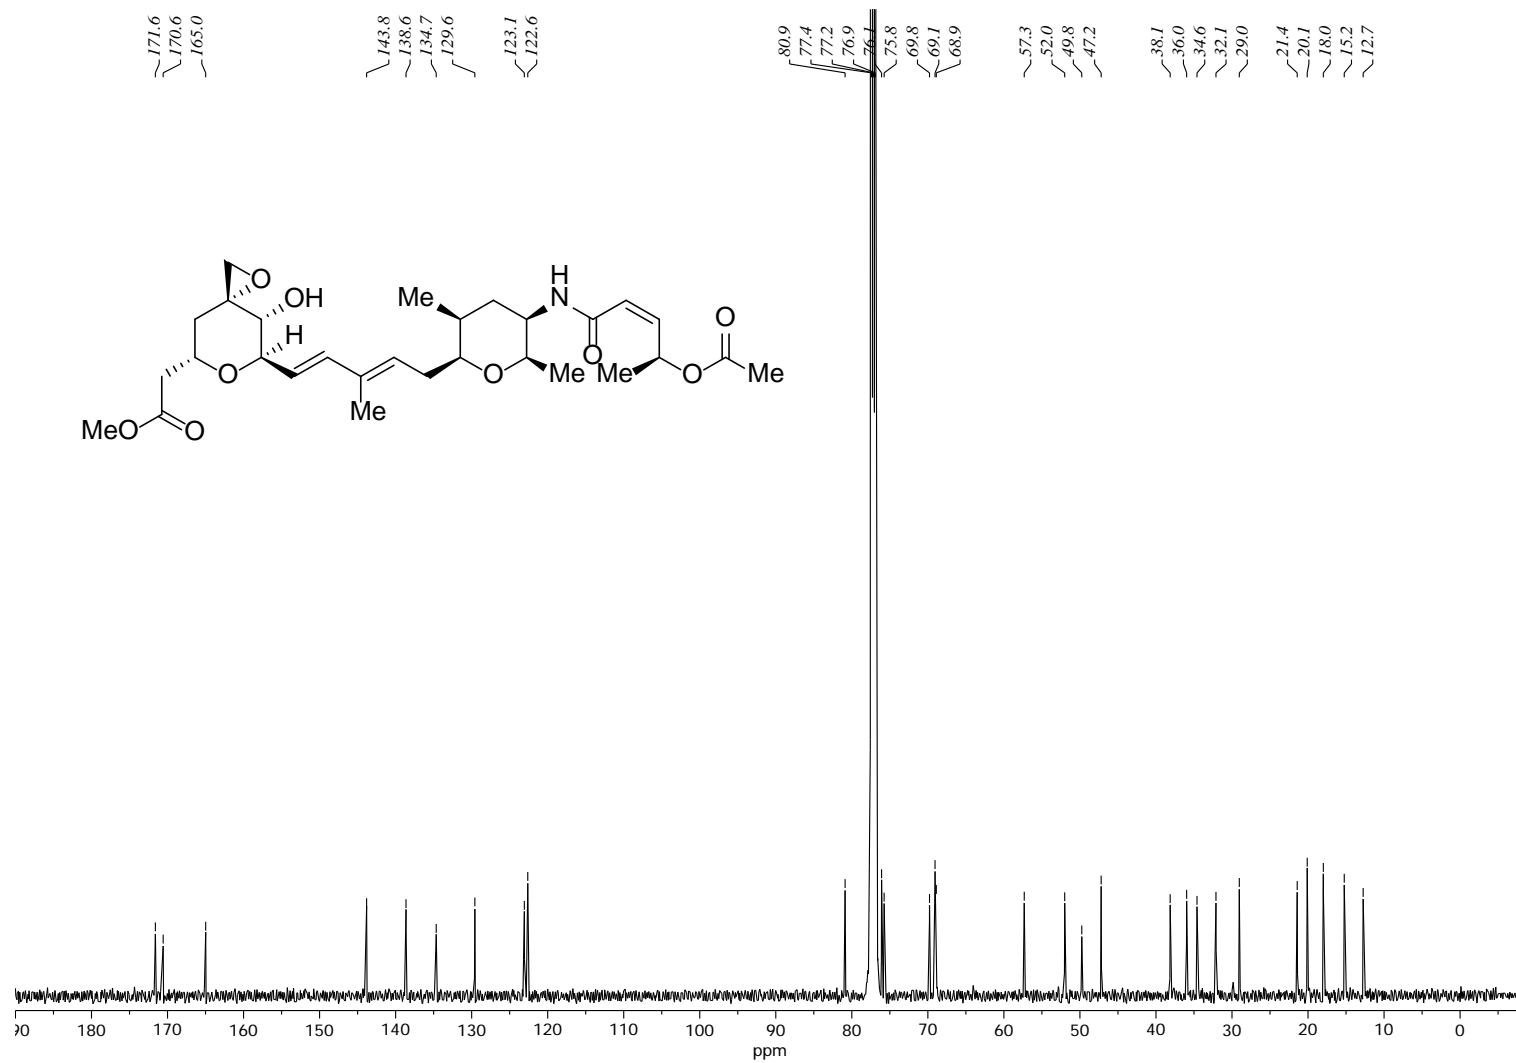

Figure S36. <sup>13</sup>C NMR (125 MHz, CDCl<sub>3</sub>) of Thailanstatin A Methyl Ester (**2**)
